# Supplementary material
Source: PubMed Central journal article supplement (PMC6169534)
Supplement: NIHMS986411-supplement-2.pdf [file NIHMS986411-supplement-2.pdf]

## Leap.in

```
source oldff/leaprc.ff99SB
```

```
addAtomTypes {  
  { "C3" "C" "sp3" }  
  { "CI" "C" "sp3" }  
  { "C1" "C" "sp2" }  
  { "C2" "C" "sp2" }  
  { "OP" "O" "sp2" }  
  { "OR" "O" "sp3" }  
}
```

```
addPdbAtomMap {  
  { "OP1" "O1P" }  
  { "OP2" "O2P" }  
}
```

```
loadamberprep rna_nuc94bsc0-ez1-ol3_Case-all_Phos.in  
ci = loadamberparams frcmod.parmbsc0  
chi = loadamberparams frcmod.OL3.chi  
case = loadamberparams frcmod.99bsc0-chiol3-CaseP  
loadOff ions08.lib
```

**rna\_nuc94bsc0-ez1-ol3 Case-all Phos.in**

1 0 2

db94.dat

R-ADENOSINE - with 5' - OH end group and 3' - O(minus)

| RA5     | INT   | 1  |     |    |    |    |      |        |         |         |
|---------|-------|----|-----|----|----|----|------|--------|---------|---------|
| CORRECT | NOMIT | DU | BEG |    |    |    |      |        |         |         |
| 0.0     |       |    |     |    |    |    |      |        |         |         |
| 1       | DUMM  | DU | M   | 0  | -1 | -2 | 0.00 | 0.00   | 0.00    | 0.0000  |
| 2       | DUMM  | DU | M   | 1  | 0  | -1 | 1.00 | 0.00   | 0.00    | 0.0000  |
| 3       | DUMM  | DU | M   | 2  | 1  | 0  | 1.00 | 90.00  | 0.00    | 0.0000  |
| 4       | H5T   | HO | M   | 3  | 2  | 1  | 1.00 | 120.00 | 180.00  | 0.4295  |
| 5       | O5'   | OH | M   | 4  | 3  | 2  | 0.96 | 101.43 | -98.89  | -0.6223 |
| 6       | C5'   | CI | M   | 5  | 4  | 3  | 1.44 | 119.00 | -39.22  | 0.0558  |
| 7       | H5'1  | H1 | E   | 6  | 5  | 4  | 1.09 | 109.50 | 60.00   | 0.0679  |
| 8       | H5'2  | H1 | E   | 6  | 5  | 4  | 1.09 | 109.50 | -60.00  | 0.0679  |
| 9       | C4'   | CT | M   | 6  | 5  | 4  | 1.52 | 110.00 | 180.00  | 0.1065  |
| 10      | H4'   | H1 | E   | 9  | 6  | 5  | 1.09 | 109.50 | -200.00 | 0.1174  |
| 11      | O4'   | OS | S   | 9  | 6  | 5  | 1.46 | 108.86 | -86.31  | -0.3548 |
| 12      | C1'   | CT | B   | 11 | 9  | 6  | 1.42 | 110.04 | 105.60  | 0.0394  |
| 13      | H1'   | H2 | E   | 12 | 11 | 9  | 1.09 | 109.50 | -240.00 | 0.2007  |
| 14      | N9    | N* | S   | 12 | 11 | 9  | 1.52 | 109.59 | -127.70 | -0.0251 |
| 15      | C8    | C2 | B   | 14 | 12 | 11 | 1.37 | 131.20 | 81.59   | 0.2006  |
| 16      | H8    | H5 | E   | 15 | 14 | 12 | 1.08 | 120.00 | 0.00    | 0.1553  |
| 17      | N7    | NB | S   | 15 | 14 | 12 | 1.30 | 113.93 | 177.00  | -0.6073 |
| 18      | C5    | CB | S   | 17 | 15 | 14 | 1.39 | 104.00 | 0.00    | 0.0515  |
| 19      | C6    | CA | B   | 18 | 17 | 15 | 1.40 | 132.42 | 180.00  | 0.7009  |
| 20      | N6    | N2 | B   | 19 | 18 | 17 | 1.34 | 123.50 | 0.00    | -0.9019 |
| 21      | H61   | H  | E   | 20 | 19 | 18 | 1.01 | 120.00 | 180.00  | 0.4115  |
| 22      | H62   | H  | E   | 20 | 19 | 18 | 1.01 | 120.00 | 0.00    | 0.4115  |
| 23      | N1    | NC | S   | 19 | 18 | 17 | 1.34 | 117.43 | 180.00  | -0.7615 |
| 24      | C2    | CQ | B   | 23 | 19 | 18 | 1.33 | 118.80 | 0.00    | 0.5875  |
| 25      | H2    | H5 | E   | 24 | 23 | 19 | 1.08 | 120.00 | 180.00  | 0.0473  |
| 26      | N3    | NC | S   | 24 | 23 | 19 | 1.32 | 129.17 | 0.00    | -0.6997 |
| 27      | C4    | CB | E   | 26 | 24 | 23 | 1.35 | 110.80 | 0.00    | 0.3053  |
| 28      | C3'   | C3 | M   | 9  | 6  | 5  | 1.53 | 115.78 | -329.11 | 0.2022  |
| 29      | H3'   | H1 | E   | 28 | 9  | 6  | 1.09 | 109.50 | 30.00   | 0.0615  |
| 30      | C2'   | CT | B   | 28 | 9  | 6  | 1.53 | 102.80 | -86.30  | 0.0670  |
| 31      | H2'1  | H1 | E   | 30 | 28 | 9  | 1.09 | 109.50 | 120.00  | 0.0972  |
| 32      | O2'   | OH | S   | 30 | 28 | 9  | 1.43 | 109.50 | 240.00  | -0.6139 |
| 33      | HO'2  | HO | E   | 32 | 30 | 28 | 0.96 | 107.00 | 180.00  | 0.4186  |
| 34      | O3'   | OR | M   | 28 | 9  | 6  | 1.42 | 116.52 | -203.47 | -0.5246 |

CHARGE RA5E

|         |         |         |         |         |
|---------|---------|---------|---------|---------|
| 0.4295  | -0.6223 | 0.0558  | 0.0679  | 0.0679  |
| 0.1065  | 0.1174  | -0.3548 | 0.0394  | 0.2007  |
| -0.0251 | 0.2006  | 0.1553  | -0.6073 | 0.0515  |
| 0.7009  | -0.9019 | 0.4115  | 0.4115  | -0.7615 |
| 0.5875  | 0.0473  | -0.6997 | 0.3053  | 0.2022  |
| 0.0615  | 0.0670  | 0.0972  | -0.6139 | 0.4186  |
| -0.5246 |         |         |         |         |

IMPROPER

|    |     |    |     |
|----|-----|----|-----|
| C8 | C4  | N9 | C1' |
| C6 | H61 | N6 | H62 |
| N7 | N9  | C8 | H8  |
| N1 | N3  | C2 | H2  |
| C5 | N1  | C6 | N6  |

LOOP CLOSING EXPLICIT

C1' C2'  
 C4 C5  
 C4 N9

DONE

R-ADENOSINE - with 5' - phosphate group and 3' - O(minus) group

| RA      | INT  | 1  |     |    |    |    |      |        |         |         |         |
|---------|------|----|-----|----|----|----|------|--------|---------|---------|---------|
| CORRECT | OMIT | DU | BEG |    |    |    |      |        |         |         |         |
| 0.0     |      |    |     |    |    |    |      |        |         |         |         |
| 1       | DUMM | DU | M   | 0  | -1 | -2 | 0.00 | 0.00   | 0.00    | 0.00    | 0.0000  |
| 2       | DUMM | DU | M   | 1  | 0  | -1 | 1.00 | 0.00   | 0.00    | 0.00    | 0.0000  |
| 3       | DUMM | DU | M   | 2  | 1  | 0  | 1.00 | 90.00  | 0.00    | 0.00    | 0.0000  |
| 4       | P    | P  | M   | 3  | 2  | 1  | 1.60 | 119.04 | 200.00  | 1.1662  | 1.1662  |
| 5       | O1P  | OP | E   | 4  | 3  | 2  | 1.48 | 109.61 | 150.00  | -0.7760 | -0.7760 |
| 6       | O2P  | OP | E   | 4  | 3  | 2  | 1.48 | 109.58 | 20.00   | -0.7760 | -0.7760 |
| 7       | O5'  | OR | M   | 4  | 3  | 2  | 1.60 | 101.43 | -98.89  | -0.4989 | -0.4989 |
| 8       | C5'  | CI | M   | 7  | 4  | 3  | 1.44 | 119.00 | -39.22  | 0.0558  | 0.0558  |
| 9       | H5'1 | H1 | E   | 8  | 7  | 4  | 1.09 | 109.50 | 60.00   | 0.0679  | 0.0679  |
| 10      | H5'2 | H1 | E   | 8  | 7  | 4  | 1.09 | 109.50 | -60.00  | 0.0679  | 0.0679  |
| 11      | C4'  | CT | M   | 8  | 7  | 4  | 1.52 | 110.00 | 180.00  | 0.1065  | 0.1065  |
| 12      | H4'  | H1 | E   | 11 | 8  | 7  | 1.09 | 109.50 | -200.00 | 0.1174  | 0.1174  |
| 13      | O4'  | OS | S   | 11 | 8  | 7  | 1.46 | 108.86 | -86.31  | -0.3548 | -0.3548 |
| 14      | C1'  | CT | B   | 13 | 11 | 8  | 1.42 | 110.04 | 105.60  | 0.0394  | 0.0394  |
| 15      | H1'  | H2 | E   | 14 | 13 | 11 | 1.09 | 109.50 | -240.00 | 0.2007  | 0.2007  |
| 16      | N9   | N* | S   | 14 | 13 | 11 | 1.52 | 109.59 | -127.70 | -0.0251 | -0.0251 |
| 17      | C8   | C2 | B   | 16 | 14 | 13 | 1.37 | 131.20 | 81.59   | 0.2006  | 0.2006  |
| 18      | H8   | H5 | E   | 17 | 16 | 14 | 1.08 | 120.00 | 0.00    | 0.1553  | 0.1553  |
| 19      | N7   | NB | S   | 17 | 16 | 14 | 1.30 | 113.93 | 177.00  | -0.6073 | -0.6073 |
| 20      | C5   | CB | S   | 19 | 17 | 16 | 1.39 | 104.00 | 0.00    | 0.0515  | 0.0515  |
| 21      | C6   | CA | B   | 20 | 19 | 17 | 1.40 | 132.42 | 180.00  | 0.7009  | 0.7009  |
| 22      | N6   | N2 | B   | 21 | 20 | 19 | 1.34 | 123.50 | 0.00    | -0.9019 | -0.9019 |
| 23      | H61  | H  | E   | 22 | 21 | 20 | 1.01 | 120.00 | 180.00  | 0.4115  | 0.4115  |
| 24      | H62  | H  | E   | 22 | 21 | 20 | 1.01 | 120.00 | 0.00    | 0.4115  | 0.4115  |
| 25      | N1   | NC | S   | 21 | 20 | 19 | 1.34 | 117.43 | 180.00  | -0.7615 | -0.7615 |
| 26      | C2   | CQ | B   | 25 | 21 | 20 | 1.33 | 118.80 | 0.00    | 0.5875  | 0.5875  |
| 27      | H2   | H5 | E   | 26 | 25 | 21 | 1.08 | 120.00 | 180.00  | 0.0473  | 0.0473  |
| 28      | N3   | NC | S   | 26 | 25 | 21 | 1.32 | 129.17 | 0.00    | -0.6997 | -0.6997 |
| 29      | C4   | CB | E   | 28 | 26 | 25 | 1.35 | 110.80 | 0.00    | 0.3053  | 0.3053  |
| 30      | C3'  | C3 | M   | 11 | 8  | 7  | 1.53 | 115.78 | -329.11 | 0.2022  | 0.2022  |
| 31      | H3'  | H1 | E   | 30 | 11 | 8  | 1.09 | 109.50 | 30.00   | 0.0615  | 0.0615  |
| 32      | C2'  | CT | B   | 30 | 11 | 8  | 1.53 | 102.80 | -86.30  | 0.0670  | 0.0670  |
| 33      | H2'1 | H1 | E   | 32 | 30 | 11 | 1.09 | 109.50 | 120.00  | 0.0972  | 0.0972  |
| 34      | O2'  | OH | S   | 32 | 30 | 11 | 1.43 | 109.50 | 240.00  | -0.6139 | -0.6139 |
| 35      | HO'2 | HO | E   | 34 | 32 | 30 | 0.96 | 107.00 | 180.00  | 0.4186  | 0.4186  |
| 36      | O3'  | OR | M   | 30 | 11 | 8  | 1.42 | 116.52 | -203.47 | -0.5246 | -0.5246 |

CHARGE RA

|         |         |         |         |         |
|---------|---------|---------|---------|---------|
| 1.1662  | -0.7760 | -0.7760 | -0.4989 | 0.0558  |
| 0.0679  | 0.0679  | 0.1065  | 0.1174  | -0.3548 |
| 0.0394  | 0.2007  | -0.0251 | 0.2006  | 0.1553  |
| -0.6073 | 0.0515  | 0.7009  | -0.9019 | 0.4115  |
| 0.4115  | -0.7615 | 0.5875  | 0.0473  | -0.6997 |
| 0.3053  | 0.2022  | 0.0615  | 0.0670  | 0.0972  |
| -0.6139 | 0.4186  | -0.5246 |         |         |

IMPROPER

C8 C4 N9 C1'  
 C6 H61 N6 H62  
 N7 N9 C8 H8

N1 N3 C2 H2  
 C5 N1 C6 N6

LOOP CLOSING EXPLICIT

C1' C2'  
 C4 C5  
 C4 N9

DONE

R-ADENOSINE - with 5' - phosphate group and 3' - OH group

| RA3     | INT  | 1  |     |    |    |    |      |        |         |         |        |  |
|---------|------|----|-----|----|----|----|------|--------|---------|---------|--------|--|
| CORRECT | OMIT | DU | BEG |    |    |    |      |        |         |         |        |  |
| 0.0     |      |    |     |    |    |    |      |        |         |         |        |  |
| 1       | DUMM | DU | M   | 0  | -1 | -2 | 0.00 | 0.00   | 0.00    | 0.00    | 0.0000 |  |
| 2       | DUMM | DU | M   | 1  | 0  | -1 | 1.00 | 0.00   | 0.00    | 0.00    | 0.0000 |  |
| 3       | DUMM | DU | M   | 2  | 1  | 0  | 1.00 | 90.00  | 0.00    | 0.00    | 0.0000 |  |
| 4       | P    | P  | M   | 3  | 2  | 1  | 1.60 | 119.04 | 200.00  | 1.1662  |        |  |
| 5       | O1P  | OP | E   | 4  | 3  | 2  | 1.48 | 109.61 | 150.00  | -0.7760 |        |  |
| 6       | O2P  | OP | E   | 4  | 3  | 2  | 1.48 | 109.58 | 20.00   | -0.7760 |        |  |
| 7       | O5'  | OR | M   | 4  | 3  | 2  | 1.60 | 101.43 | -98.89  | -0.4989 |        |  |
| 8       | C5'  | CI | M   | 7  | 4  | 3  | 1.44 | 119.00 | -39.22  | 0.0558  |        |  |
| 9       | H5'1 | H1 | E   | 8  | 7  | 4  | 1.09 | 109.50 | 60.00   | 0.0679  |        |  |
| 10      | H5'2 | H1 | E   | 8  | 7  | 4  | 1.09 | 109.50 | -60.00  | 0.0679  |        |  |
| 11      | C4'  | CT | M   | 8  | 7  | 4  | 1.52 | 110.00 | 180.00  | 0.1065  |        |  |
| 12      | H4'  | H1 | E   | 11 | 8  | 7  | 1.09 | 109.50 | -200.00 | 0.1174  |        |  |
| 13      | O4'  | OS | S   | 11 | 8  | 7  | 1.46 | 108.86 | -86.31  | -0.3548 |        |  |
| 14      | C1'  | CT | B   | 13 | 11 | 8  | 1.42 | 110.04 | 105.60  | 0.0394  |        |  |
| 15      | H1'  | H2 | E   | 14 | 13 | 11 | 1.09 | 109.50 | -240.00 | 0.2007  |        |  |
| 16      | N9   | N* | S   | 14 | 13 | 11 | 1.52 | 109.59 | -127.70 | -0.0251 |        |  |
| 17      | C8   | C2 | B   | 16 | 14 | 13 | 1.37 | 131.20 | 81.59   | 0.2006  |        |  |
| 18      | H8   | H5 | E   | 17 | 16 | 14 | 1.08 | 120.00 | 0.00    | 0.1553  |        |  |
| 19      | N7   | NB | S   | 17 | 16 | 14 | 1.30 | 113.93 | 177.00  | -0.6073 |        |  |
| 20      | C5   | CB | S   | 19 | 17 | 16 | 1.39 | 104.00 | 0.00    | 0.0515  |        |  |
| 21      | C6   | CA | B   | 20 | 19 | 17 | 1.40 | 132.42 | 180.00  | 0.7009  |        |  |
| 22      | N6   | N2 | B   | 21 | 20 | 19 | 1.34 | 123.50 | 0.00    | -0.9019 |        |  |
| 23      | H61  | H  | E   | 22 | 21 | 20 | 1.01 | 120.00 | 180.00  | 0.4115  |        |  |
| 24      | H62  | H  | E   | 22 | 21 | 20 | 1.01 | 120.00 | 0.00    | 0.4115  |        |  |
| 25      | N1   | NC | S   | 21 | 20 | 19 | 1.34 | 117.43 | 180.00  | -0.7615 |        |  |
| 26      | C2   | CQ | B   | 25 | 21 | 20 | 1.33 | 118.80 | 0.00    | 0.5875  |        |  |
| 27      | H2   | H5 | E   | 26 | 25 | 21 | 1.08 | 120.00 | 180.00  | 0.0473  |        |  |
| 28      | N3   | NC | S   | 26 | 25 | 21 | 1.32 | 129.17 | 0.00    | -0.6997 |        |  |
| 29      | C4   | CB | E   | 28 | 26 | 25 | 1.35 | 110.80 | 0.00    | 0.3053  |        |  |
| 30      | C3'  | C3 | M   | 11 | 8  | 7  | 1.53 | 115.78 | -329.11 | 0.2022  |        |  |
| 31      | H3'  | H1 | E   | 30 | 11 | 8  | 1.09 | 109.50 | 30.00   | 0.0615  |        |  |
| 32      | C2'  | CT | B   | 30 | 11 | 8  | 1.53 | 102.80 | -86.30  | 0.0670  |        |  |
| 33      | H2'1 | H1 | E   | 32 | 30 | 11 | 1.09 | 109.50 | 120.00  | 0.0972  |        |  |
| 34      | O2'  | OH | S   | 32 | 30 | 11 | 1.43 | 109.50 | 240.00  | -0.6139 |        |  |
| 35      | HO'2 | HO | E   | 34 | 32 | 30 | 0.96 | 107.00 | 180.00  | 0.4186  |        |  |
| 36      | O3'  | OH | M   | 30 | 11 | 8  | 1.42 | 116.52 | -203.47 | -0.6541 |        |  |
| 37      | H3T  | HO | M   | 36 | 30 | 11 | 0.96 | 114.97 | 180.00  | 0.4376  |        |  |

CHARGE RA3E

|         |         |         |         |         |
|---------|---------|---------|---------|---------|
| 1.1662  | -0.7760 | -0.7760 | -0.4989 | 0.0558  |
| 0.0679  | 0.0679  | 0.1065  | 0.1174  | -0.3548 |
| 0.0394  | 0.2007  | -0.0251 | 0.2006  | 0.1553  |
| -0.6073 | 0.0515  | 0.7009  | -0.9019 | 0.4115  |
| 0.4115  | -0.7615 | 0.5875  | 0.0473  | -0.6997 |
| 0.3053  | 0.2022  | 0.0615  | 0.0670  | 0.0972  |
| -0.6139 | 0.4186  | -0.6541 | 0.4376  |         |

IMPROPER

C8 C4 N9 C1'  
C6 H61 N6 H62  
N7 N9 C8 H8  
N1 N3 C2 H2  
C5 N1 C6 N6

LOOP CLOSING EXPLICIT

C1' C2'  
C4 C5  
C4 N9

DONE

R-ADENOSINE - with 5' - OH group and 3' - OH group

| RAN     | INT   | 1  |     |    |    |    |      |        |         |         |  |
|---------|-------|----|-----|----|----|----|------|--------|---------|---------|--|
| CORRECT | NOMIT | DU | BEG |    |    |    |      |        |         |         |  |
| 0.0     |       |    |     |    |    |    |      |        |         |         |  |
| 1       | DUMM  | DU | M   | 0  | -1 | -2 | 0.00 | 0.00   | 0.00    | 0.0000  |  |
| 2       | DUMM  | DU | M   | 1  | 0  | -1 | 1.00 | 0.00   | 0.00    | 0.0000  |  |
| 3       | DUMM  | DU | M   | 2  | 1  | 0  | 1.00 | 90.00  | 0.00    | 0.0000  |  |
| 4       | H5T   | HO | M   | 3  | 2  | 1  | 1.00 | 120.00 | 180.00  | 0.4295  |  |
| 5       | O5'   | OH | M   | 4  | 3  | 2  | 0.96 | 101.43 | -98.89  | -0.6223 |  |
| 6       | C5'   | CI | M   | 5  | 4  | 3  | 1.44 | 119.00 | -39.22  | 0.0558  |  |
| 7       | H5'1  | H1 | E   | 6  | 5  | 4  | 1.09 | 109.50 | 60.00   | 0.0679  |  |
| 8       | H5'2  | H1 | E   | 6  | 5  | 4  | 1.09 | 109.50 | -60.00  | 0.0679  |  |
| 9       | C4'   | CT | M   | 6  | 5  | 4  | 1.52 | 110.00 | 180.00  | 0.1065  |  |
| 10      | H4'   | H1 | E   | 9  | 6  | 5  | 1.09 | 109.50 | -200.00 | 0.1174  |  |
| 11      | O4'   | OS | S   | 9  | 6  | 5  | 1.46 | 108.86 | -86.31  | -0.3548 |  |
| 12      | C1'   | CT | B   | 11 | 9  | 6  | 1.42 | 110.04 | 105.60  | 0.0394  |  |
| 13      | H1'   | H2 | E   | 12 | 11 | 9  | 1.09 | 109.50 | -240.00 | 0.2007  |  |
| 14      | N9    | N* | S   | 12 | 11 | 9  | 1.52 | 109.59 | -127.70 | -0.0251 |  |
| 15      | C8    | C2 | B   | 14 | 12 | 11 | 1.37 | 131.20 | 81.59   | 0.2006  |  |
| 16      | H8    | H5 | E   | 15 | 14 | 12 | 1.08 | 120.00 | 0.00    | 0.1553  |  |
| 17      | N7    | NB | S   | 15 | 14 | 12 | 1.30 | 113.93 | 177.00  | -0.6073 |  |
| 18      | C5    | CB | S   | 17 | 15 | 14 | 1.39 | 104.00 | 0.00    | 0.0515  |  |
| 19      | C6    | CA | B   | 18 | 17 | 15 | 1.40 | 132.42 | 180.00  | 0.7009  |  |
| 20      | N6    | N2 | B   | 19 | 18 | 17 | 1.34 | 123.50 | 0.00    | -0.9019 |  |
| 21      | H61   | H  | E   | 20 | 19 | 18 | 1.01 | 120.00 | 180.00  | 0.4115  |  |
| 22      | H62   | H  | E   | 20 | 19 | 18 | 1.01 | 120.00 | 0.00    | 0.4115  |  |
| 23      | N1    | NC | S   | 19 | 18 | 17 | 1.34 | 117.43 | 180.00  | -0.7615 |  |
| 24      | C2    | CQ | B   | 23 | 19 | 18 | 1.33 | 118.80 | 0.00    | 0.5875  |  |
| 25      | H2    | H5 | E   | 24 | 23 | 19 | 1.08 | 120.00 | 180.00  | 0.0473  |  |
| 26      | N3    | NC | S   | 24 | 23 | 19 | 1.32 | 129.17 | 0.00    | -0.6997 |  |
| 27      | C4    | CB | E   | 26 | 24 | 23 | 1.35 | 110.80 | 0.00    | 0.3053  |  |
| 28      | C3'   | C3 | M   | 9  | 6  | 5  | 1.53 | 115.78 | -329.11 | 0.2022  |  |
| 29      | H3'   | H1 | E   | 28 | 9  | 6  | 1.09 | 109.50 | 30.00   | 0.0615  |  |
| 30      | C2'   | CT | B   | 28 | 9  | 6  | 1.53 | 102.80 | -86.30  | 0.0670  |  |
| 31      | H2'1  | H1 | E   | 30 | 28 | 9  | 1.09 | 109.50 | 120.00  | 0.0972  |  |
| 32      | O2'   | OH | S   | 30 | 28 | 9  | 1.43 | 109.50 | 240.00  | -0.6139 |  |
| 33      | HO'2  | HO | E   | 32 | 30 | 28 | 0.96 | 107.00 | 180.00  | 0.4186  |  |
| 34      | O3'   | OH | M   | 28 | 9  | 6  | 1.42 | 116.52 | -203.47 | -0.6541 |  |
| 35      | H3T   | HO | M   | 34 | 28 | 9  | 0.96 | 114.97 | 180.00  | 0.4376  |  |

CHARGE resp RADE

|         |         |         |         |         |
|---------|---------|---------|---------|---------|
| 0.4295  | -0.6223 | 0.0558  | 0.0679  | 0.0679  |
| 0.1065  | 0.1174  | -0.3548 | 0.0394  | 0.2007  |
| -0.0251 | 0.2006  | 0.1553  | -0.6073 | 0.0515  |
| 0.7009  | -0.9019 | 0.4115  | 0.4115  | -0.7615 |

0.5875 0.0473 -0.6997 0.3053 0.2022  
 0.0615 0.0670 0.0972 -0.6139 0.4186  
 -0.6541 0.4376

IMPROPER

C8 C4 N9 C1'  
 C6 H61 N6 H62  
 N7 N9 C8 H8  
 N1 N3 C2 H2  
 C5 N1 C6 N6

LOOP CLOSING EXPLICIT

C1' C2'  
 C4 C5  
 C4 N9

DONE

R-URACIL - with 5' - OH end group and 3' - O(minus)

| RU5     | INT   | 1  |     |    |    |    |      |        |         |         |  |
|---------|-------|----|-----|----|----|----|------|--------|---------|---------|--|
| CORRECT | NOMIT | DU | BEG |    |    |    |      |        |         |         |  |
| 0.0     |       |    |     |    |    |    |      |        |         |         |  |
| 1       | DUMM  | DU | M   | 0  | -1 | -2 | 0.00 | 0.00   | 0.00    | 0.0000  |  |
| 2       | DUMM  | DU | M   | 1  | 0  | -1 | 1.00 | 0.00   | 0.00    | 0.0000  |  |
| 3       | DUMM  | DU | M   | 2  | 1  | 0  | 1.00 | 90.00  | 0.00    | 0.0000  |  |
| 4       | H5T   | HO | M   | 3  | 2  | 1  | 1.00 | 120.00 | 180.00  | 0.4295  |  |
| 5       | O5'   | OH | M   | 4  | 3  | 2  | 0.96 | 101.43 | -98.89  | -0.6223 |  |
| 6       | C5'   | CI | M   | 5  | 4  | 3  | 1.44 | 119.00 | -39.22  | 0.0558  |  |
| 7       | H5'1  | H1 | E   | 6  | 5  | 4  | 1.09 | 109.50 | 60.00   | 0.0679  |  |
| 8       | H5'2  | H1 | E   | 6  | 5  | 4  | 1.09 | 109.50 | -60.00  | 0.0679  |  |
| 9       | C4'   | CT | M   | 6  | 5  | 4  | 1.52 | 110.00 | -180.00 | 0.1065  |  |
| 10      | H4'   | H1 | E   | 9  | 6  | 5  | 1.09 | 109.50 | -200.00 | 0.1174  |  |
| 11      | O4'   | OS | S   | 9  | 6  | 5  | 1.46 | 108.86 | -86.31  | -0.3548 |  |
| 12      | C1'   | CT | B   | 11 | 9  | 6  | 1.42 | 110.04 | 105.60  | 0.0674  |  |
| 13      | H1'   | H2 | E   | 12 | 11 | 9  | 1.09 | 109.50 | -240.00 | 0.1824  |  |
| 14      | N1    | N* | S   | 12 | 11 | 9  | 1.53 | 109.59 | -127.70 | 0.0418  |  |
| 15      | C6    | CM | B   | 14 | 12 | 11 | 1.37 | 123.04 | 81.59   | -0.1126 |  |
| 16      | H6    | H4 | E   | 15 | 14 | 12 | 1.08 | 120.00 | 0.00    | 0.2188  |  |
| 17      | C5    | CM | B   | 15 | 14 | 12 | 1.34 | 121.22 | 177.30  | -0.3635 |  |
| 18      | H5    | HA | E   | 17 | 15 | 14 | 1.09 | 120.00 | 180.00  | 0.1811  |  |
| 19      | C4    | C  | B   | 17 | 15 | 14 | 1.44 | 120.78 | 0.00    | 0.5952  |  |
| 20      | O4    | O  | E   | 19 | 17 | 15 | 1.23 | 125.35 | 180.00  | -0.5761 |  |
| 21      | N3    | NA | B   | 19 | 17 | 15 | 1.38 | 114.07 | 0.00    | -0.3549 |  |
| 22      | H3    | H  | E   | 21 | 19 | 17 | 1.09 | 116.77 | 180.00  | 0.3154  |  |
| 23      | C2    | C  | S   | 21 | 19 | 17 | 1.38 | 126.46 | 0.00    | 0.4687  |  |
| 24      | O2    | O  | E   | 23 | 21 | 19 | 1.22 | 121.70 | 180.00  | -0.5477 |  |
| 25      | C3'   | C3 | M   | 9  | 6  | 5  | 1.53 | 115.78 | -329.11 | 0.2022  |  |
| 26      | H3'   | H1 | E   | 25 | 9  | 6  | 1.09 | 109.50 | 30.00   | 0.0615  |  |
| 27      | C2'   | CT | B   | 25 | 9  | 6  | 1.53 | 102.80 | -86.30  | 0.0670  |  |
| 28      | H2'1  | H1 | E   | 27 | 25 | 9  | 1.09 | 109.50 | 120.00  | 0.0972  |  |
| 29      | O2'   | OH | S   | 27 | 25 | 9  | 1.43 | 109.50 | 240.00  | -0.6139 |  |
| 30      | HO'2  | HO | E   | 29 | 27 | 25 | 0.96 | 107.00 | 180.00  | 0.4186  |  |
| 31      | O3'   | OR | M   | 25 | 9  | 6  | 1.42 | 116.52 | -203.47 | -0.5246 |  |

CHARGE RU5E

0.4295 -0.6223 0.0558 0.0679 0.0679  
 0.1065 0.1174 -0.3548 0.0674 0.1824  
 0.0418 -0.1126 0.2188 -0.3635 0.1811  
 0.5952 -0.5761 -0.3549 0.3154 0.4687  
 -0.5477 0.2022 0.0615 0.0670 0.0972

-0.6139 0.4186 -0.5246

IMPROPER

C6 C2 N1 C1 '  
C4 C6 C5 H5  
N1 N3 C2 O2  
C5 N3 C4 O4  
C2 C4 N3 H3  
N1 C5 C6 H6

LOOP CLOSING EXPLICIT

C1' C2 '  
C2 N1

DONE

R-URACIL - with 5' - phosphate group and 3' - O(minus) group

| RU      | INT  | 1  |     |    |    |    |      |        |         |         |  |
|---------|------|----|-----|----|----|----|------|--------|---------|---------|--|
| CORRECT | OMIT | DU | BEG |    |    |    |      |        |         |         |  |
| 0.0     |      |    |     |    |    |    |      |        |         |         |  |
| 1       | DUMM | DU | M   | 0  | -1 | -2 | 0.00 | 0.00   | 0.00    | 0.0000  |  |
| 2       | DUMM | DU | M   | 1  | 0  | -1 | 1.00 | 0.00   | 0.00    | 0.0000  |  |
| 3       | DUMM | DU | M   | 2  | 1  | 0  | 1.00 | 90.00  | 0.00    | 0.0000  |  |
| 4       | P    | P  | M   | 3  | 2  | 1  | 1.60 | 119.04 | 200.00  | 1.1662  |  |
| 5       | O1P  | OP | E   | 4  | 3  | 2  | 1.48 | 109.61 | 150.00  | -0.7760 |  |
| 6       | O2P  | OP | E   | 4  | 3  | 2  | 1.48 | 109.58 | 20.00   | -0.7760 |  |
| 7       | O5'  | OR | M   | 4  | 3  | 2  | 1.60 | 101.43 | -98.89  | -0.4989 |  |
| 8       | C5'  | CI | M   | 7  | 4  | 3  | 1.44 | 119.00 | -39.22  | 0.0558  |  |
| 9       | H5'1 | H1 | E   | 8  | 7  | 4  | 1.09 | 109.50 | 60.00   | 0.0679  |  |
| 10      | H5'2 | H1 | E   | 8  | 7  | 4  | 1.09 | 109.50 | -60.00  | 0.0679  |  |
| 11      | C4'  | CT | M   | 8  | 7  | 4  | 1.52 | 110.00 | 180.00  | 0.1065  |  |
| 12      | H4'  | H1 | E   | 11 | 8  | 7  | 1.09 | 109.50 | -200.00 | 0.1174  |  |
| 13      | O4'  | OS | S   | 11 | 8  | 7  | 1.46 | 108.86 | -86.31  | -0.3548 |  |
| 14      | C1'  | CT | B   | 13 | 11 | 8  | 1.42 | 110.04 | 105.60  | 0.0674  |  |
| 15      | H1'  | H2 | E   | 14 | 13 | 11 | 1.09 | 109.50 | -240.00 | 0.1824  |  |
| 16      | N1   | N* | S   | 14 | 13 | 11 | 1.53 | 109.59 | -127.70 | 0.0418  |  |
| 17      | C6   | CM | B   | 16 | 14 | 13 | 1.37 | 123.04 | 81.59   | -0.1126 |  |
| 18      | H6   | H4 | E   | 17 | 16 | 14 | 1.08 | 120.00 | 0.00    | 0.2188  |  |
| 19      | C5   | CM | B   | 17 | 16 | 14 | 1.34 | 121.22 | 177.30  | -0.3635 |  |
| 20      | H5   | HA | E   | 19 | 17 | 16 | 1.09 | 120.00 | 180.00  | 0.1811  |  |
| 21      | C4   | C  | B   | 19 | 17 | 16 | 1.44 | 120.78 | 0.00    | 0.5952  |  |
| 22      | O4   | O  | E   | 21 | 19 | 17 | 1.23 | 125.35 | 180.00  | -0.5761 |  |
| 23      | N3   | NA | B   | 21 | 19 | 17 | 1.38 | 114.07 | 0.00    | -0.3549 |  |
| 24      | H3   | H  | E   | 23 | 21 | 19 | 1.09 | 116.77 | 180.00  | 0.3154  |  |
| 25      | C2   | C  | S   | 23 | 21 | 19 | 1.38 | 126.46 | 0.00    | 0.4687  |  |
| 26      | O2   | O  | E   | 25 | 23 | 21 | 1.22 | 121.70 | 180.00  | -0.5477 |  |
| 27      | C3'  | C3 | M   | 11 | 8  | 7  | 1.53 | 115.78 | -329.11 | 0.2022  |  |
| 28      | H3'  | H1 | E   | 27 | 11 | 8  | 1.09 | 109.50 | 30.00   | 0.0615  |  |
| 29      | C2'  | CT | B   | 27 | 11 | 8  | 1.53 | 102.80 | -86.30  | 0.0670  |  |
| 30      | H2'1 | H1 | E   | 29 | 27 | 11 | 1.09 | 109.50 | 120.00  | 0.0972  |  |
| 31      | O2'  | OH | S   | 29 | 27 | 11 | 1.43 | 109.50 | 240.00  | -0.6139 |  |
| 32      | HO'2 | HO | E   | 31 | 29 | 27 | 0.96 | 107.00 | 180.00  | 0.4186  |  |
| 33      | O3'  | OR | M   | 27 | 11 | 8  | 1.42 | 116.52 | -203.47 | -0.5246 |  |

CHARGE RU

1.1662 -0.7760 -0.7760 -0.4989 0.0558  
0.0679 0.0679 0.1065 0.1174 -0.3548  
0.0674 0.1824 0.0418 -0.1126 0.2188  
-0.3635 0.1811 0.5952 -0.5761 -0.3549  
0.3154 0.4687 -0.5477 0.2022 0.0615

0.0670 0.0972 -0.6139 0.4186 -0.5246

IMPROPER

C6 C2 N1 C1'  
C4 C6 C5 H5  
N1 N3 C2 O2  
C5 N3 C4 O4  
C2 C4 N3 H3  
N1 C5 C6 H6

LOOP CLOSING EXPLICIT

C1' C2'  
C2 N1

DONE

R-URACIL - with 5' - phosphate group and 3' - OH group

RU3 INT 1  
CORRECT OMIT DU

BEG

0.0

|    |      |    |   |    |    |    |      |        |         |         |
|----|------|----|---|----|----|----|------|--------|---------|---------|
| 1  | DUMM | DU | M | 0  | -1 | -2 | 0.00 | 0.00   | 0.00    | 0.0000  |
| 2  | DUMM | DU | M | 1  | 0  | -1 | 1.00 | 0.00   | 0.00    | 0.0000  |
| 3  | DUMM | DU | M | 2  | 1  | 0  | 1.00 | 90.00  | 0.00    | 0.0000  |
| 4  | P    | P  | M | 3  | 2  | 1  | 1.60 | 119.04 | 200.00  | 1.1662  |
| 5  | O1P  | OP | E | 4  | 3  | 2  | 1.48 | 109.61 | 150.00  | -0.7760 |
| 6  | O2P  | OP | E | 4  | 3  | 2  | 1.48 | 109.58 | 20.00   | -0.7760 |
| 7  | O5'  | OR | M | 4  | 3  | 2  | 1.60 | 101.43 | -98.89  | -0.4989 |
| 8  | C5'  | CI | M | 7  | 4  | 3  | 1.44 | 119.00 | -39.22  | 0.0558  |
| 9  | H5'1 | H1 | E | 8  | 7  | 4  | 1.09 | 109.50 | 60.00   | 0.0679  |
| 10 | H5'2 | H1 | E | 8  | 7  | 4  | 1.09 | 109.50 | -60.00  | 0.0679  |
| 11 | C4'  | CT | M | 8  | 7  | 4  | 1.52 | 110.00 | 180.00  | 0.1065  |
| 12 | H4'  | H1 | E | 11 | 8  | 7  | 1.09 | 109.50 | -200.00 | 0.1174  |
| 13 | O4'  | OS | S | 11 | 8  | 7  | 1.46 | 108.86 | -86.31  | -0.3548 |
| 14 | C1'  | CT | B | 13 | 11 | 8  | 1.42 | 110.04 | 105.60  | 0.0674  |
| 15 | H1'  | H2 | E | 14 | 13 | 11 | 1.09 | 109.50 | -240.00 | 0.1824  |
| 16 | N1   | N* | S | 14 | 13 | 11 | 1.53 | 109.59 | -127.70 | 0.0418  |
| 17 | C6   | CM | B | 16 | 14 | 13 | 1.37 | 123.04 | 81.59   | -0.1126 |
| 18 | H6   | H4 | E | 17 | 16 | 14 | 1.08 | 120.00 | 0.00    | 0.2188  |
| 19 | C5   | CM | B | 17 | 16 | 14 | 1.34 | 121.22 | 177.30  | -0.3635 |
| 20 | H5   | HA | E | 19 | 17 | 16 | 1.09 | 120.00 | 180.00  | 0.1811  |
| 21 | C4   | C  | B | 19 | 17 | 16 | 1.44 | 120.78 | 0.00    | 0.5952  |
| 22 | O4   | O  | E | 21 | 19 | 17 | 1.23 | 125.35 | 180.00  | -0.5761 |
| 23 | N3   | NA | B | 21 | 19 | 17 | 1.38 | 114.07 | 0.00    | -0.3549 |
| 24 | H3   | H  | E | 23 | 21 | 19 | 1.09 | 116.77 | 180.00  | 0.3154  |
| 25 | C2   | C  | S | 23 | 21 | 19 | 1.38 | 126.46 | 0.00    | 0.4687  |
| 26 | O2   | O  | E | 25 | 23 | 21 | 1.22 | 121.70 | 180.00  | -0.5477 |
| 27 | C3'  | C3 | M | 11 | 8  | 7  | 1.53 | 115.78 | -329.11 | 0.2022  |
| 28 | H3'  | H1 | E | 27 | 11 | 8  | 1.09 | 109.50 | 30.00   | 0.0615  |
| 29 | C2'  | CT | B | 27 | 11 | 8  | 1.53 | 102.80 | -86.30  | 0.0670  |
| 30 | H2'1 | H1 | E | 29 | 27 | 11 | 1.09 | 109.50 | 120.00  | 0.0972  |
| 31 | O2'  | OH | S | 29 | 27 | 11 | 1.43 | 109.50 | 240.00  | -0.6139 |
| 32 | HO'2 | HO | E | 31 | 29 | 27 | 0.96 | 107.00 | 180.00  | 0.4186  |
| 33 | O3'  | OH | M | 27 | 11 | 8  | 1.42 | 116.52 | -203.47 | -0.6541 |
| 34 | H3T  | HO | M | 33 | 27 | 11 | 0.96 | 114.97 | 180.00  | 0.4376  |

CHARGE RU3E

1.1662 -0.7760 -0.7760 -0.4989 0.0558  
0.0679 0.0679 0.1065 0.1174 -0.3548  
0.0674 0.1824 0.0418 -0.1126 0.2188  
-0.3635 0.1811 0.5952 -0.5761 -0.3549



0.3154 0.4687 -0.5477 0.2022 0.0615  
 0.0670 0.0972 -0.6139 0.4186 -0.6541  
 0.4376

IMPROPER

C6 C2 N1 C1'  
 C4 C6 C5 H5  
 N1 N3 C2 O2  
 C5 N3 C4 O4  
 C2 C4 N3 H3  
 N1 C5 C6 H6

LOOP CLOSING EXPLICIT

C1' C2'  
 C2 N1

DONE

R-URACIL - with 5' - OH group and 3' - OH group

| RUN     | INT   |    | 1   |    |    |    |      |        |         |         |  |
|---------|-------|----|-----|----|----|----|------|--------|---------|---------|--|
| CORRECT | NOMIT | DU | BEG |    |    |    |      |        |         |         |  |
| 0.0     |       |    |     |    |    |    |      |        |         |         |  |
| 1       | DUMM  | DU | M   | 0  | -1 | -2 | 0.00 | 0.00   | 0.00    | 0.0000  |  |
| 2       | DUMM  | DU | M   | 1  | 0  | -1 | 1.00 | 0.00   | 0.00    | 0.0000  |  |
| 3       | DUMM  | DU | M   | 2  | 1  | 0  | 1.00 | 90.00  | 0.00    | 0.0000  |  |
| 4       | H5T   | HO | M   | 3  | 2  | 1  | 1.00 | 120.00 | 180.00  | 0.4295  |  |
| 5       | O5'   | OH | M   | 4  | 3  | 2  | 0.96 | 101.43 | -98.89  | -0.6223 |  |
| 6       | C5'   | CI | M   | 5  | 4  | 3  | 1.44 | 119.00 | -39.22  | 0.0558  |  |
| 7       | H5'1  | H1 | E   | 6  | 5  | 4  | 1.09 | 109.50 | 60.00   | 0.0679  |  |
| 8       | H5'2  | H1 | E   | 6  | 5  | 4  | 1.09 | 109.50 | -60.00  | 0.0679  |  |
| 9       | C4'   | CT | M   | 6  | 5  | 4  | 1.52 | 110.00 | -180.00 | 0.1065  |  |
| 10      | H4'   | H1 | E   | 9  | 6  | 5  | 1.09 | 109.50 | -200.00 | 0.1174  |  |
| 11      | O4'   | OS | S   | 9  | 6  | 5  | 1.46 | 108.86 | -86.31  | -0.3548 |  |
| 12      | C1'   | CT | B   | 11 | 9  | 6  | 1.42 | 110.04 | 105.60  | 0.0674  |  |
| 13      | H1'   | H2 | E   | 12 | 11 | 9  | 1.09 | 109.50 | -240.00 | 0.1824  |  |
| 14      | N1    | N* | S   | 12 | 11 | 9  | 1.53 | 109.59 | -127.70 | 0.0418  |  |
| 15      | C6    | CM | B   | 14 | 12 | 11 | 1.37 | 123.04 | 81.59   | -0.1126 |  |
| 16      | H6    | H4 | E   | 15 | 14 | 12 | 1.08 | 120.00 | 0.00    | 0.2188  |  |
| 17      | C5    | CM | B   | 15 | 14 | 12 | 1.34 | 121.22 | 177.30  | -0.3635 |  |
| 18      | H5    | HA | E   | 17 | 15 | 14 | 1.09 | 120.00 | 180.00  | 0.1811  |  |
| 19      | C4    | C  | B   | 17 | 15 | 14 | 1.44 | 120.78 | 0.00    | 0.5952  |  |
| 20      | O4    | O  | E   | 19 | 17 | 15 | 1.23 | 125.35 | 180.00  | -0.5761 |  |
| 21      | N3    | NA | B   | 19 | 17 | 15 | 1.38 | 114.07 | 0.00    | -0.3549 |  |
| 22      | H3    | H  | E   | 21 | 19 | 17 | 1.09 | 116.77 | 180.00  | 0.3154  |  |
| 23      | C2    | C  | S   | 21 | 19 | 17 | 1.38 | 126.46 | 0.00    | 0.4687  |  |
| 24      | O2    | O  | E   | 23 | 21 | 19 | 1.22 | 121.70 | 180.00  | -0.5477 |  |
| 25      | C3'   | C3 | M   | 9  | 6  | 5  | 1.53 | 115.78 | -329.11 | 0.2022  |  |
| 26      | H3'   | H1 | E   | 25 | 9  | 6  | 1.09 | 109.50 | 30.00   | 0.0615  |  |
| 27      | C2'   | CT | B   | 25 | 9  | 6  | 1.53 | 102.80 | -86.30  | 0.0670  |  |
| 28      | H2'1  | H1 | E   | 27 | 25 | 9  | 1.09 | 109.50 | 120.00  | 0.0972  |  |
| 29      | O2'   | OH | S   | 27 | 25 | 9  | 1.43 | 109.50 | 240.00  | -0.6139 |  |
| 30      | HO'2  | HO | E   | 29 | 27 | 25 | 0.96 | 107.00 | 180.00  | 0.4186  |  |
| 31      | O3'   | OH | M   | 25 | 9  | 6  | 1.42 | 116.52 | -203.47 | -0.6541 |  |
| 32      | H3T   | HO | M   | 31 | 25 | 9  | 0.96 | 114.97 | 180.00  | 0.4376  |  |

CHARGE resp RURA

0.4295 -0.6223 0.0558 0.0679 0.0679  
 0.1065 0.1174 -0.3548 0.0674 0.1824  
 0.0418 -0.1126 0.2188 -0.3635 0.1811  
 0.5952 -0.5761 -0.3549 0.3154 0.4687

-0.5477 0.2022 0.0615 0.0670 0.0972  
 -0.6139 0.4186 -0.6541 0.4376

IMPROPER

C6 C2 N1 C1'  
 C4 C6 C5 H5  
 N1 N3 C2 O2  
 C5 N3 C4 O4  
 C2 C4 N3 H3  
 N1 C5 C6 H6

LOOP CLOSING EXPLICIT

C1' C2'  
 C2 N1

DONE

R-GUANOSINE - with 5' - OH end group and 3' - O(minus) group

RG5 INT 1

CORRECT NOMIT DU BEG

0.0

|    |      |    |   |    |    |    |      |        |         |         |
|----|------|----|---|----|----|----|------|--------|---------|---------|
| 1  | DUMM | DU | M | 0  | -1 | -2 | 0.00 | 0.00   | 0.00    | 0.0000  |
| 2  | DUMM | DU | M | 1  | 0  | -1 | 1.00 | 0.00   | 0.00    | 0.0000  |
| 3  | DUMM | DU | M | 2  | 1  | 0  | 1.00 | 90.00  | 0.00    | 0.0000  |
| 4  | H5T  | HO | M | 3  | 2  | 1  | 1.00 | 120.00 | 180.00  | 0.4295  |
| 5  | O5'  | OH | M | 4  | 3  | 2  | 0.96 | 101.43 | -98.89  | -0.6223 |
| 6  | C5'  | CI | M | 5  | 4  | 3  | 1.44 | 119.00 | -39.22  | 0.0558  |
| 7  | H5'1 | H1 | E | 6  | 5  | 4  | 1.09 | 109.50 | 60.00   | 0.0679  |
| 8  | H5'2 | H1 | E | 6  | 5  | 4  | 1.09 | 109.50 | -60.00  | 0.0679  |
| 9  | C4'  | CT | M | 6  | 5  | 4  | 1.52 | 110.00 | -180.00 | 0.1065  |
| 10 | H4'  | H1 | E | 9  | 6  | 5  | 1.09 | 109.50 | -200.00 | 0.1174  |
| 11 | O4'  | OS | S | 9  | 6  | 5  | 1.46 | 108.86 | -86.31  | -0.3548 |
| 12 | C1'  | CT | B | 11 | 9  | 5  | 1.42 | 110.04 | 105.60  | 0.0191  |
| 13 | H1'  | H2 | E | 12 | 11 | 9  | 1.09 | 109.50 | -240.00 | 0.2006  |
| 14 | N9   | N* | S | 12 | 11 | 9  | 1.49 | 108.06 | -127.70 | 0.0492  |
| 15 | C8   | CK | B | 14 | 12 | 11 | 1.38 | 129.20 | 81.59   | 0.1374  |
| 16 | H8   | H5 | E | 15 | 14 | 12 | 1.08 | 120.00 | 0.00    | 0.1640  |
| 17 | N7   | NB | S | 15 | 14 | 12 | 1.31 | 114.00 | -179.90 | -0.5709 |
| 18 | C5   | CB | S | 17 | 15 | 14 | 1.39 | 103.90 | 0.00    | 0.1744  |
| 19 | C6   | C  | B | 18 | 17 | 15 | 1.42 | 130.40 | 180.00  | 0.4770  |
| 20 | O6   | O  | E | 19 | 18 | 17 | 1.23 | 128.80 | 0.00    | -0.5597 |
| 21 | N1   | NA | B | 19 | 18 | 17 | 1.40 | 111.38 | 180.00  | -0.4787 |
| 22 | H1   | H  | E | 21 | 19 | 18 | 1.00 | 117.36 | 179.90  | 0.3424  |
| 23 | C2   | CA | B | 21 | 19 | 18 | 1.38 | 125.24 | -0.10   | 0.7657  |
| 24 | N2   | N2 | B | 23 | 21 | 19 | 1.34 | 116.02 | 180.00  | -0.9672 |
| 25 | H21  | H  | E | 24 | 23 | 21 | 1.01 | 127.00 | -0.82   | 0.4364  |
| 26 | H22  | H  | E | 24 | 23 | 21 | 1.01 | 116.53 | -179.44 | 0.4364  |
| 27 | N3   | NC | S | 23 | 21 | 19 | 1.33 | 123.30 | 0.00    | -0.6323 |
| 28 | C4   | CB | E | 27 | 23 | 21 | 1.36 | 112.20 | 0.00    | 0.1222  |
| 29 | C3'  | C3 | M | 9  | 6  | 5  | 1.53 | 115.78 | -329.11 | 0.2022  |
| 30 | H3'  | H1 | E | 29 | 9  | 6  | 1.09 | 109.50 | 30.00   | 0.0615  |
| 31 | C2'  | CT | B | 29 | 9  | 6  | 1.53 | 102.80 | -86.30  | 0.0670  |
| 32 | H2'1 | H1 | E | 31 | 29 | 9  | 1.09 | 109.50 | 120.00  | 0.0972  |
| 33 | O2'  | OH | S | 31 | 29 | 9  | 1.43 | 109.50 | 240.00  | -0.6139 |
| 34 | HO'2 | HO | E | 33 | 31 | 29 | 0.96 | 107.00 | 180.00  | 0.4186  |
| 35 | O3'  | OR | M | 29 | 9  | 6  | 1.42 | 116.52 | -203.47 | -0.5246 |

CHARGE RG5E

0.4295 -0.6223 0.0558 0.0679 0.0679  
 0.1065 0.1174 -0.3548 0.0191 0.2006

```

0.0492  0.1374  0.1640 -0.5709  0.1744
0.4770 -0.5597 -0.4787  0.3424  0.7657
-0.9672 0.4364  0.4364 -0.6323  0.1222
0.2022  0.0615  0.0670  0.0972 -0.6139
0.4186 -0.5246

```

IMPROPER

```

C8  C4  N9  C1'
C5  N1  C6  O6
C6  C2  N1  H1
C2  H21 N2  H22
N7  N9  C8  H8
N1  N3  C2  N2

```

LOOP CLOSING EXPLICIT

```

C1'  C2'
C4  C5
C4  N9

```

DONE

R-GUANOSINE - with 5' - phosphate group and 3' - O(minus) group

```

RG  INT      1
CORRECT OMIT DU  BEG
0.0
 1  DUMM  DU  M  0  -1  -2  0.00  0.00  0.00  0.0000
 2  DUMM  DU  M  1  0  -1  1.00  0.00  0.00  0.0000
 3  DUMM  DU  M  2  1  0  1.00  90.00  0.00  0.0000
 4  P      P  M  3  2  1  1.60  119.04  200.00  1.1662
 5  O1P   OP  E  4  3  2  1.48  109.61  150.00  -0.7760
 6  O2P   OP  E  4  3  2  1.48  109.58  20.00  -0.7760
 7  O5'   OR  M  4  3  2  1.60  101.43  -98.89  -0.4989
 8  C5'   CI  M  7  4  3  1.44  119.00  -39.22  0.0558
 9  H5'1  H1  E  8  7  4  1.09  109.50  60.00  0.0679
10  H5'2  H1  E  8  7  4  1.09  109.50  -60.00  0.0679
11  C4'   CT  M  8  7  4  1.52  110.00  180.00  0.1065
12  H4'   H1  E  11 8  7  1.09  109.50  -200.00  0.1174
13  O4'   OS  S  11 8  7  1.46  108.86  -86.31  -0.3548
14  C1'   CT  B  13 11 8  1.42  110.04  105.60  0.0191
15  H1'   H2  E  14 13 11 1.09  109.50  -240.00  0.2006
16  N9    N*  S  14 13 11 1.49  108.06  -127.70  0.0492
17  C8    CK  B  16 14 13 1.38  129.20  81.59  0.1374
18  H8    H5  E  17 16 14 1.08  120.00  0.00  0.1640
19  N7    NB  S  17 16 14 1.31  114.00  -179.90  -0.5709
20  C5    CB  S  19 17 16 1.39  103.90  0.00  0.1744
21  C6    C  B  20 19 17 1.42  130.40  180.00  0.4770
22  O6    O  E  21 20 19 1.23  128.80  0.00  -0.5597
23  N1    NA  B  21 20 19 1.40  111.38  180.00  -0.4787
24  H1    H  E  23 21 20 1.00  117.36  179.90  0.3424
25  C2    CA  B  23 21 20 1.38  125.24  -0.10  0.7657
26  N2    N2  B  25 23 21 1.34  116.02  180.00  -0.9672
27  H21   H  E  26 25 23 1.01  127.00  -0.82  0.4364
28  H22   H  E  26 25 23 1.01  116.53  -179.44  0.4364
29  N3    NC  S  25 23 21 1.33  123.30  0.00  -0.6323
30  C4    CB  E  29 25 23 1.36  112.20  0.00  0.1222
31  C3'   C3  M  11  8  7  1.53  115.78  -329.11  0.2022
32  H3'   H1  E  31 11  8  1.09  109.50  30.00  0.0615
33  C2'   CT  B  31 11  8  1.53  102.80  -86.30  0.0670
34  H2'1  H1  E  33 31 11  1.09  109.50  120.00  0.0972
35  O2'   OH  S  33 31 11  1.43  109.50  240.00  -0.6139

```

|    |      |    |   |    |    |    |      |        |         |         |
|----|------|----|---|----|----|----|------|--------|---------|---------|
| 36 | HO'2 | HO | E | 35 | 33 | 31 | 0.96 | 107.00 | 180.00  | 0.4186  |
| 37 | O3'  | OR | M | 31 | 11 | 8  | 1.42 | 116.52 | -203.47 | -0.5246 |

CHARGE RG

|         |         |         |         |         |
|---------|---------|---------|---------|---------|
| 1.1662  | -0.7760 | -0.7760 | -0.4989 | 0.0558  |
| 0.0679  | 0.0679  | 0.1065  | 0.1174  | -0.3548 |
| 0.0191  | 0.2006  | 0.0492  | 0.1374  | 0.1640  |
| -0.5709 | 0.1744  | 0.4770  | -0.5597 | -0.4787 |
| 0.3424  | 0.7657  | -0.9672 | 0.4364  | 0.4364  |
| -0.6323 | 0.1222  | 0.2022  | 0.0615  | 0.0670  |
| 0.0972  | -0.6139 | 0.4186  | -0.5246 |         |

IMPROPER

|    |     |    |     |
|----|-----|----|-----|
| C8 | C4  | N9 | C1' |
| C5 | N1  | C6 | O6  |
| C6 | C2  | N1 | H1  |
| C2 | H21 | N2 | H22 |
| N7 | N9  | C8 | H8  |
| N1 | N3  | C2 | N2  |

LOOP CLOSING EXPLICIT

|     |     |
|-----|-----|
| C1' | C2' |
| C4  | C5  |
| C4  | N9  |

DONE

R-GUANOSINE - with 5' - phosphate group and 3' - OH group

|         |      |    |     |    |    |    |      |        |         |         |
|---------|------|----|-----|----|----|----|------|--------|---------|---------|
| RG3     | INT  | 1  |     |    |    |    |      |        |         |         |
| CORRECT | OMIT | DU | BEG |    |    |    |      |        |         |         |
| 0.0     |      |    |     |    |    |    |      |        |         |         |
| 1       | DUMM | DU | M   | 0  | -1 | -2 | 0.00 | 0.00   | 0.00    | 0.0000  |
| 2       | DUMM | DU | M   | 1  | 0  | -1 | 1.00 | 0.00   | 0.00    | 0.0000  |
| 3       | DUMM | DU | M   | 2  | 1  | 0  | 1.00 | 90.00  | 0.00    | 0.0000  |
| 4       | P    | P  | M   | 3  | 2  | 1  | 1.60 | 119.04 | 200.00  | 1.1662  |
| 5       | O1P  | OP | E   | 4  | 3  | 2  | 1.48 | 109.61 | 150.00  | -0.7760 |
| 6       | O2P  | OP | E   | 4  | 3  | 2  | 1.48 | 109.58 | 20.00   | -0.7760 |
| 7       | O5'  | OR | M   | 4  | 3  | 2  | 1.60 | 101.43 | -98.89  | -0.4989 |
| 8       | C5'  | CI | M   | 7  | 4  | 3  | 1.44 | 119.00 | -39.22  | 0.0558  |
| 9       | H5'1 | H1 | E   | 8  | 7  | 4  | 1.09 | 109.50 | 60.00   | 0.0679  |
| 10      | H5'2 | H1 | E   | 8  | 7  | 4  | 1.09 | 109.50 | -60.00  | 0.0679  |
| 11      | C4'  | CT | M   | 8  | 7  | 4  | 1.52 | 110.00 | 180.00  | 0.1065  |
| 12      | H4'  | H1 | E   | 11 | 8  | 7  | 1.09 | 109.50 | -200.00 | 0.1174  |
| 13      | O4'  | OS | S   | 11 | 8  | 7  | 1.46 | 108.86 | -86.31  | -0.3548 |
| 14      | C1'  | CT | B   | 13 | 11 | 8  | 1.42 | 110.04 | 105.60  | 0.0191  |
| 15      | H1'  | H2 | E   | 14 | 13 | 11 | 1.09 | 109.50 | -240.00 | 0.2006  |
| 16      | N9   | N* | S   | 14 | 13 | 11 | 1.49 | 108.06 | -127.70 | 0.0492  |
| 17      | C8   | CK | B   | 16 | 14 | 13 | 1.38 | 129.20 | 81.59   | 0.1374  |
| 18      | H8   | H5 | E   | 17 | 16 | 14 | 1.08 | 120.00 | 0.00    | 0.1640  |
| 19      | N7   | NB | S   | 17 | 16 | 14 | 1.31 | 114.00 | -179.90 | -0.5709 |
| 20      | C5   | CB | S   | 19 | 17 | 16 | 1.39 | 103.90 | 0.00    | 0.1744  |
| 21      | C6   | C  | B   | 20 | 19 | 17 | 1.42 | 130.40 | 180.00  | 0.4770  |
| 22      | O6   | O  | E   | 21 | 20 | 19 | 1.23 | 128.80 | 0.00    | -0.5597 |
| 23      | N1   | NA | B   | 21 | 20 | 19 | 1.40 | 111.38 | 180.00  | -0.4787 |
| 24      | H1   | H  | E   | 23 | 21 | 20 | 1.00 | 117.36 | 179.90  | 0.3424  |
| 25      | C2   | CA | B   | 23 | 21 | 20 | 1.38 | 125.24 | -0.10   | 0.7657  |
| 26      | N2   | N2 | B   | 25 | 23 | 21 | 1.34 | 116.02 | 180.00  | -0.9672 |
| 27      | H21  | H  | E   | 26 | 25 | 23 | 1.01 | 127.00 | -0.82   | 0.4364  |
| 28      | H22  | H  | E   | 26 | 25 | 23 | 1.01 | 116.53 | -179.44 | 0.4364  |
| 29      | N3   | NC | S   | 25 | 23 | 21 | 1.33 | 123.30 | 0.00    | -0.6323 |

|    |      |    |   |    |    |    |      |        |         |         |
|----|------|----|---|----|----|----|------|--------|---------|---------|
| 30 | C4   | CB | E | 29 | 25 | 23 | 1.36 | 112.20 | 0.00    | 0.1222  |
| 31 | C3'  | C3 | M | 11 | 8  | 7  | 1.53 | 115.78 | -329.11 | 0.2022  |
| 32 | H3'  | H1 | E | 31 | 11 | 8  | 1.09 | 109.50 | 30.00   | 0.0615  |
| 33 | C2'  | CT | B | 31 | 11 | 8  | 1.53 | 102.80 | -86.30  | 0.0670  |
| 34 | H2'1 | H1 | E | 33 | 31 | 11 | 1.09 | 109.50 | 120.00  | 0.0972  |
| 35 | O2'  | OH | S | 33 | 31 | 11 | 1.43 | 109.50 | 240.00  | -0.6139 |
| 36 | HO'2 | HO | E | 35 | 33 | 31 | 0.96 | 107.00 | 180.00  | 0.4186  |
| 37 | O3'  | OH | M | 31 | 11 | 8  | 1.42 | 116.52 | -203.47 | -0.6541 |
| 38 | H3T  | HO | M | 37 | 31 | 11 | 0.96 | 114.97 | 180.00  | 0.4376  |

CHARGE RG3E

|         |         |         |         |         |
|---------|---------|---------|---------|---------|
| 1.1662  | -0.7760 | -0.7760 | -0.4989 | 0.0558  |
| 0.0679  | 0.0679  | 0.1065  | 0.1174  | -0.3548 |
| 0.0191  | 0.2006  | 0.0492  | 0.1374  | 0.1640  |
| -0.5709 | 0.1744  | 0.4770  | -0.5597 | -0.4787 |
| 0.3424  | 0.7657  | -0.9672 | 0.4364  | 0.4364  |
| -0.6323 | 0.1222  | 0.2022  | 0.0615  | 0.0670  |
| 0.0972  | -0.6139 | 0.4186  | -0.6541 | 0.4376  |

IMPROPER

|    |     |    |     |
|----|-----|----|-----|
| C8 | C4  | N9 | C1' |
| C5 | N1  | C6 | O6  |
| C6 | C2  | N1 | H1  |
| C2 | H21 | N2 | H22 |
| N7 | N9  | C8 | H8  |
| N1 | N3  | C2 | N2  |

LOOP CLOSING EXPLICIT

|     |     |
|-----|-----|
| C1' | C2' |
| C4  | C5  |
| C4  | N9  |

DONE

R-GUANOSINE - with 5' - OH group and 3' - OH group

| RGN     | INT   | 1  |     |    |    |    |      |        |         |         |
|---------|-------|----|-----|----|----|----|------|--------|---------|---------|
| CORRECT | NOMIT | DU | BEG |    |    |    |      |        |         |         |
| 0.0     |       |    |     |    |    |    |      |        |         |         |
| 1       | DUMM  | DU | M   | 0  | -1 | -2 | 0.00 | 0.00   | 0.00    | 0.0000  |
| 2       | DUMM  | DU | M   | 1  | 0  | -1 | 1.00 | 0.00   | 0.00    | 0.0000  |
| 3       | DUMM  | DU | M   | 2  | 1  | 0  | 1.00 | 90.00  | 0.00    | 0.0000  |
| 4       | H5T   | HO | M   | 3  | 2  | 1  | 1.00 | 120.00 | 180.00  | 0.4295  |
| 5       | O5'   | OH | M   | 4  | 3  | 2  | 0.96 | 101.43 | -98.89  | -0.6223 |
| 6       | C5'   | CI | M   | 5  | 4  | 3  | 1.44 | 119.00 | -39.22  | 0.0558  |
| 7       | H5'1  | H1 | E   | 6  | 5  | 4  | 1.09 | 109.50 | 60.00   | 0.0679  |
| 8       | H5'2  | H1 | E   | 6  | 5  | 4  | 1.09 | 109.50 | -60.00  | 0.0679  |
| 9       | C4'   | CT | M   | 6  | 5  | 4  | 1.52 | 110.00 | -180.00 | 0.1065  |
| 10      | H4'   | H1 | E   | 9  | 6  | 5  | 1.09 | 109.50 | -200.00 | 0.1174  |
| 11      | O4'   | OS | S   | 9  | 6  | 5  | 1.46 | 108.86 | -86.31  | -0.3548 |
| 12      | C1'   | CT | B   | 11 | 9  | 5  | 1.42 | 110.04 | 105.60  | 0.0191  |
| 13      | H1'   | H2 | E   | 12 | 11 | 9  | 1.09 | 109.50 | -240.00 | 0.2006  |
| 14      | N9    | N* | S   | 12 | 11 | 9  | 1.49 | 108.06 | -127.70 | 0.0492  |
| 15      | C8    | CK | B   | 14 | 12 | 11 | 1.38 | 129.20 | 81.59   | 0.1374  |
| 16      | H8    | H5 | E   | 15 | 14 | 12 | 1.08 | 120.00 | 0.00    | 0.1640  |
| 17      | N7    | NB | S   | 15 | 14 | 12 | 1.31 | 114.00 | -179.90 | -0.5709 |
| 18      | C5    | CB | S   | 17 | 15 | 14 | 1.39 | 103.90 | 0.00    | 0.1744  |
| 19      | C6    | C  | B   | 18 | 17 | 15 | 1.42 | 130.40 | 180.00  | 0.4770  |
| 20      | O6    | O  | E   | 19 | 18 | 17 | 1.23 | 128.80 | 0.00    | -0.5597 |
| 21      | N1    | NA | B   | 19 | 18 | 17 | 1.40 | 111.38 | 180.00  | -0.4787 |
| 22      | H1    | H  | E   | 21 | 19 | 18 | 1.00 | 117.36 | 179.90  | 0.3424  |

|    |      |    |   |    |    |    |      |        |         |         |
|----|------|----|---|----|----|----|------|--------|---------|---------|
| 23 | C2   | CA | B | 21 | 19 | 18 | 1.38 | 125.24 | -0.10   | 0.7657  |
| 24 | N2   | N2 | B | 23 | 21 | 19 | 1.34 | 116.02 | 180.00  | -0.9672 |
| 25 | H21  | H  | E | 24 | 23 | 21 | 1.01 | 127.00 | -0.82   | 0.4364  |
| 26 | H22  | H  | E | 24 | 23 | 21 | 1.01 | 116.53 | -179.44 | 0.4364  |
| 27 | N3   | NC | S | 23 | 21 | 19 | 1.33 | 123.30 | 0.00    | -0.6323 |
| 28 | C4   | CB | E | 27 | 23 | 21 | 1.36 | 112.20 | 0.00    | 0.1222  |
| 29 | C3'  | C3 | M | 9  | 6  | 5  | 1.53 | 115.78 | -329.11 | 0.2022  |
| 30 | H3'  | H1 | E | 29 | 9  | 6  | 1.09 | 109.50 | 30.00   | 0.0615  |
| 31 | C2'  | CT | B | 29 | 9  | 6  | 1.53 | 102.80 | -86.30  | 0.0670  |
| 32 | H2'1 | H1 | E | 31 | 29 | 9  | 1.09 | 109.50 | 120.00  | 0.0972  |
| 33 | O2'  | OH | S | 31 | 29 | 9  | 1.43 | 109.50 | 240.00  | -0.6139 |
| 34 | HO'2 | HO | E | 33 | 31 | 29 | 0.96 | 107.00 | 180.00  | 0.4186  |
| 35 | O3'  | OH | M | 29 | 9  | 6  | 1.42 | 116.52 | -203.47 | -0.6541 |
| 36 | H3T  | HO | M | 35 | 29 | 9  | 0.96 | 114.97 | 180.00  | 0.4376  |

CHARGE resp RGUA

|         |         |         |         |         |
|---------|---------|---------|---------|---------|
| 0.4295  | -0.6223 | 0.0558  | 0.0679  | 0.0679  |
| 0.1065  | 0.1174  | -0.3548 | 0.0191  | 0.2006  |
| 0.0492  | 0.1374  | 0.1640  | -0.5709 | 0.1744  |
| 0.4770  | -0.5597 | -0.4787 | 0.3424  | 0.7657  |
| -0.9672 | 0.4364  | 0.4364  | -0.6323 | 0.1222  |
| 0.2022  | 0.0615  | 0.0670  | 0.0972  | -0.6139 |
| 0.4186  | -0.6541 | 0.4376  |         |         |

IMPROPER

|    |     |    |     |
|----|-----|----|-----|
| C8 | C4  | N9 | C1' |
| C5 | N1  | C6 | O6  |
| C6 | C2  | N1 | H1  |
| C2 | H21 | N2 | H22 |
| N7 | N9  | C8 | H8  |
| N1 | N3  | C2 | N2  |

LOOP CLOSING EXPLICIT

|     |     |
|-----|-----|
| C1' | C2' |
| C4  | C5  |
| C4  | N9  |

DONE

R-CYTOSINE - with 5' - OH end group and 3' - O(minus) group

| RC5     | INT   | 1  |     |    |    |    |      |        |         |         |
|---------|-------|----|-----|----|----|----|------|--------|---------|---------|
| CORRECT | NOMIT | DU | BEG |    |    |    |      |        |         |         |
| 0.0     |       |    |     |    |    |    |      |        |         |         |
| 1       | DUMM  | DU | M   | 0  | -1 | -2 | 0.00 | 0.00   | 0.00    | 0.0000  |
| 2       | DUMM  | DU | M   | 1  | 0  | -1 | 1.00 | 0.00   | 0.00    | 0.0000  |
| 3       | DUMM  | DU | M   | 2  | 1  | 0  | 1.00 | 90.00  | 0.00    | 0.0000  |
| 4       | H5T   | HO | M   | 3  | 2  | 1  | 1.00 | 120.00 | 180.00  | 0.4295  |
| 5       | O5'   | OH | M   | 4  | 3  | 2  | 0.96 | 101.43 | -98.89  | -0.6223 |
| 6       | C5'   | CI | M   | 5  | 4  | 3  | 1.44 | 119.00 | -39.22  | 0.0558  |
| 7       | H5'1  | H1 | E   | 6  | 5  | 4  | 1.09 | 109.50 | 60.00   | 0.0679  |
| 8       | H5'2  | H1 | E   | 6  | 5  | 4  | 1.09 | 109.50 | -60.00  | 0.0679  |
| 9       | C4'   | CT | M   | 6  | 5  | 4  | 1.52 | 110.00 | -180.00 | 0.1065  |
| 10      | H4'   | H1 | E   | 9  | 6  | 5  | 1.09 | 109.50 | -200.00 | 0.1174  |
| 11      | O4'   | OS | S   | 9  | 6  | 5  | 1.46 | 108.86 | -86.31  | -0.3548 |
| 12      | C1'   | CT | B   | 11 | 9  | 5  | 1.42 | 110.04 | 105.60  | 0.0066  |
| 13      | H1'   | H2 | E   | 12 | 11 | 9  | 1.09 | 109.50 | -240.00 | 0.2029  |
| 14      | N1    | N* | S   | 12 | 11 | 9  | 1.49 | 108.10 | -127.70 | -0.0484 |
| 15      | C6    | C1 | B   | 14 | 12 | 11 | 1.36 | 121.10 | 81.59   | 0.0053  |
| 16      | H6    | H4 | E   | 15 | 14 | 12 | 1.08 | 120.00 | 0.00    | 0.1958  |
| 17      | C5    | C1 | B   | 15 | 14 | 12 | 1.36 | 121.00 | 180.00  | -0.5215 |

|    |      |    |   |    |    |    |      |        |         |         |
|----|------|----|---|----|----|----|------|--------|---------|---------|
| 18 | H5   | HA | E | 17 | 15 | 14 | 1.09 | 120.00 | 180.00  | 0.1928  |
| 19 | C4   | CA | B | 17 | 15 | 14 | 1.43 | 116.90 | 0.00    | 0.8185  |
| 20 | N4   | N2 | B | 19 | 17 | 15 | 1.32 | 120.10 | 180.00  | -0.9530 |
| 21 | H41  | H  | E | 20 | 19 | 17 | 1.01 | 117.70 | 180.00  | 0.4234  |
| 22 | H42  | H  | E | 20 | 19 | 17 | 1.01 | 120.27 | 0.00    | 0.4234  |
| 23 | N3   | NC | S | 19 | 17 | 15 | 1.33 | 121.70 | 0.00    | -0.7584 |
| 24 | C2   | C  | S | 23 | 19 | 17 | 1.36 | 120.50 | 0.00    | 0.7538  |
| 25 | O2   | O  | E | 24 | 23 | 19 | 1.24 | 122.40 | 180.00  | -0.6252 |
| 26 | C3'  | C3 | M | 9  | 6  | 5  | 1.53 | 115.78 | -329.11 | 0.2022  |
| 27 | H3'  | H1 | E | 26 | 9  | 6  | 1.09 | 109.50 | 30.00   | 0.0615  |
| 28 | C2'  | CT | B | 26 | 9  | 6  | 1.53 | 102.80 | -86.30  | 0.0670  |
| 29 | H2'1 | H1 | E | 28 | 26 | 9  | 1.09 | 109.50 | 120.00  | 0.0972  |
| 30 | O2'  | OH | S | 28 | 26 | 9  | 1.43 | 109.50 | 240.00  | -0.6139 |
| 31 | HO'2 | HO | E | 30 | 28 | 26 | 0.96 | 107.00 | 180.00  | 0.4186  |
| 32 | O3'  | OR | M | 26 | 9  | 6  | 1.42 | 116.52 | -203.47 | -0.5246 |

CHARGE RC5E

|         |         |         |         |         |
|---------|---------|---------|---------|---------|
| 0.4295  | -0.6223 | 0.0558  | 0.0679  | 0.0679  |
| 0.1065  | 0.1174  | -0.3548 | 0.0066  | 0.2029  |
| -0.0484 | 0.0053  | 0.1958  | -0.5215 | 0.1928  |
| 0.8185  | -0.9530 | 0.4234  | 0.4234  | -0.7584 |
| 0.7538  | -0.6252 | 0.2022  | 0.0615  | 0.0670  |
| 0.0972  | -0.6139 | 0.4186  | -0.5246 |         |

IMPROPER

|    |     |    |     |
|----|-----|----|-----|
| C6 | C2  | N1 | C1' |
| N1 | N3  | C2 | O2  |
| C4 | H41 | N4 | H42 |
| N1 | C5  | C6 | H6  |
| C6 | C4  | C5 | H5  |
| N3 | C5  | C4 | N4  |

LOOP CLOSING EXPLICIT

|     |     |
|-----|-----|
| C1' | C2' |
| C2  | N1  |

DONE

R-CYTOSINE - with 5' - phosphate group and 3' - O(minus) group

| RC      | INT  | 1  |     |    |    |    |      |        |         |         |
|---------|------|----|-----|----|----|----|------|--------|---------|---------|
| CORRECT | OMIT | DU | BEG |    |    |    |      |        |         |         |
| 0.0     |      |    |     |    |    |    |      |        |         |         |
| 1       | DUMM | DU | M   | 0  | -1 | -2 | 0.00 | 0.00   | 0.00    | 0.0000  |
| 2       | DUMM | DU | M   | 1  | 0  | -1 | 1.00 | 0.00   | 0.00    | 0.0000  |
| 3       | DUMM | DU | M   | 2  | 1  | 0  | 1.00 | 90.00  | 0.00    | 0.0000  |
| 4       | P    | P  | M   | 3  | 2  | 1  | 1.60 | 119.04 | 200.00  | 1.1662  |
| 5       | O1P  | OP | E   | 4  | 3  | 2  | 1.48 | 109.61 | 150.00  | -0.7760 |
| 6       | O2P  | OP | E   | 4  | 3  | 2  | 1.48 | 109.58 | 20.00   | -0.7760 |
| 7       | O5'  | OR | M   | 4  | 3  | 2  | 1.60 | 101.43 | -98.89  | -0.4989 |
| 8       | C5'  | CI | M   | 7  | 4  | 3  | 1.44 | 119.00 | -39.22  | 0.0558  |
| 9       | H5'1 | H1 | E   | 8  | 7  | 4  | 1.09 | 109.50 | 60.00   | 0.0679  |
| 10      | H5'2 | H1 | E   | 8  | 7  | 4  | 1.09 | 109.50 | -60.00  | 0.0679  |
| 11      | C4'  | CT | M   | 8  | 7  | 4  | 1.52 | 110.00 | 180.00  | 0.1065  |
| 12      | H4'  | H1 | E   | 11 | 8  | 7  | 1.09 | 109.50 | -200.00 | 0.1174  |
| 13      | O4'  | OS | S   | 11 | 8  | 7  | 1.46 | 108.86 | -86.31  | -0.3548 |
| 14      | C1'  | CT | B   | 13 | 11 | 8  | 1.42 | 110.04 | 105.60  | 0.0066  |
| 15      | H1'  | H2 | E   | 14 | 13 | 11 | 1.09 | 109.50 | -240.00 | 0.2029  |
| 16      | N1   | N* | S   | 14 | 13 | 11 | 1.49 | 108.10 | -127.70 | -0.0484 |
| 17      | C6   | C1 | B   | 16 | 14 | 13 | 1.36 | 121.10 | 81.59   | 0.0053  |
| 18      | H6   | H4 | E   | 17 | 16 | 14 | 1.08 | 120.00 | 0.00    | 0.1958  |

|    |      |    |   |    |    |    |      |        |         |         |
|----|------|----|---|----|----|----|------|--------|---------|---------|
| 19 | C5   | C1 | B | 17 | 16 | 14 | 1.36 | 121.00 | 180.00  | -0.5215 |
| 20 | H5   | HA | E | 19 | 17 | 16 | 1.09 | 120.00 | 180.00  | 0.1928  |
| 21 | C4   | CA | B | 19 | 17 | 16 | 1.43 | 116.90 | 0.00    | 0.8185  |
| 22 | N4   | N2 | B | 21 | 19 | 17 | 1.32 | 120.10 | 180.00  | -0.9530 |
| 23 | H41  | H  | E | 22 | 21 | 19 | 1.01 | 117.70 | 180.00  | 0.4234  |
| 24 | H42  | H  | E | 22 | 21 | 19 | 1.01 | 120.27 | 0.00    | 0.4234  |
| 25 | N3   | NC | S | 21 | 19 | 17 | 1.33 | 121.70 | 0.00    | -0.7584 |
| 26 | C2   | C  | S | 25 | 21 | 19 | 1.36 | 120.50 | 0.00    | 0.7538  |
| 27 | O2   | O  | E | 26 | 25 | 21 | 1.24 | 122.40 | 180.00  | -0.6252 |
| 28 | C3'  | C3 | M | 11 | 8  | 7  | 1.53 | 115.78 | -329.11 | 0.2022  |
| 29 | H3'  | H1 | E | 28 | 11 | 8  | 1.09 | 109.50 | 30.00   | 0.0615  |
| 30 | C2'  | CT | B | 28 | 11 | 8  | 1.53 | 102.80 | -86.30  | 0.0670  |
| 31 | H2'1 | H1 | E | 30 | 28 | 11 | 1.09 | 109.50 | 120.00  | 0.0972  |
| 32 | O2'  | OH | S | 30 | 28 | 11 | 1.43 | 109.50 | 240.00  | -0.6139 |
| 33 | HO'2 | HO | E | 32 | 30 | 28 | 0.96 | 107.00 | 180.00  | 0.4186  |
| 34 | O3'  | OR | M | 28 | 11 | 8  | 1.42 | 116.52 | -203.47 | -0.5246 |

CHARGE RC

|         |         |         |         |         |
|---------|---------|---------|---------|---------|
| 1.1662  | -0.7760 | -0.7760 | -0.4989 | 0.0558  |
| 0.0679  | 0.0679  | 0.1065  | 0.1174  | -0.3548 |
| 0.0066  | 0.2029  | -0.0484 | 0.0053  | 0.1958  |
| -0.5215 | 0.1928  | 0.8185  | -0.9530 | 0.4234  |
| 0.4234  | -0.7584 | 0.7538  | -0.6252 | 0.2022  |
| 0.0615  | 0.0670  | 0.0972  | -0.6139 | 0.4186  |
| -0.5246 |         |         |         |         |

IMPROPER

|    |     |    |     |
|----|-----|----|-----|
| C6 | C2  | N1 | C1' |
| N1 | N3  | C2 | O2  |
| C4 | H41 | N4 | H42 |
| N1 | C5  | C6 | H6  |
| C6 | C4  | C5 | H5  |
| N3 | C5  | C4 | N4  |

LOOP CLOSING EXPLICIT

|     |     |
|-----|-----|
| C1' | C2' |
| C2  | N1  |

DONE

R-CYTOSINE - with 5' - phosphate group and 3' - OH group

| RC3     | INT  | 1  |     |    |    |    |      |        |         |         |
|---------|------|----|-----|----|----|----|------|--------|---------|---------|
| CORRECT | OMIT | DU | BEG |    |    |    |      |        |         |         |
| 0.0     |      |    |     |    |    |    |      |        |         |         |
| 1       | DUMM | DU | M   | 0  | -1 | -2 | 0.00 | 0.00   | 0.00    | 0.0000  |
| 2       | DUMM | DU | M   | 1  | 0  | -1 | 1.00 | 0.00   | 0.00    | 0.0000  |
| 3       | DUMM | DU | M   | 2  | 1  | 0  | 1.00 | 90.00  | 0.00    | 0.0000  |
| 4       | P    | P  | M   | 3  | 2  | 1  | 1.60 | 119.04 | 200.00  | 1.1662  |
| 5       | O1P  | OP | E   | 4  | 3  | 2  | 1.48 | 109.61 | 150.00  | -0.7760 |
| 6       | O2P  | OP | E   | 4  | 3  | 2  | 1.48 | 109.58 | 20.00   | -0.7760 |
| 7       | O5'  | OR | M   | 4  | 3  | 2  | 1.60 | 101.43 | -98.89  | -0.4989 |
| 8       | C5'  | CI | M   | 7  | 4  | 3  | 1.44 | 119.00 | -39.22  | 0.0558  |
| 9       | H5'1 | H1 | E   | 8  | 7  | 4  | 1.09 | 109.50 | 60.00   | 0.0679  |
| 10      | H5'2 | H1 | E   | 8  | 7  | 4  | 1.09 | 109.50 | -60.00  | 0.0679  |
| 11      | C4'  | CT | M   | 8  | 7  | 4  | 1.52 | 110.00 | 180.00  | 0.1065  |
| 12      | H4'  | H1 | E   | 11 | 8  | 7  | 1.09 | 109.50 | -200.00 | 0.1174  |
| 13      | O4'  | OS | S   | 11 | 8  | 7  | 1.46 | 108.86 | -86.31  | -0.3548 |
| 14      | C1'  | CT | B   | 13 | 11 | 8  | 1.42 | 110.04 | 105.60  | 0.0066  |
| 15      | H1'  | H2 | E   | 14 | 13 | 11 | 1.09 | 109.50 | -240.00 | 0.2029  |
| 16      | N1   | N* | S   | 14 | 13 | 11 | 1.49 | 108.10 | -127.70 | -0.0484 |



|    |      |    |   |    |    |    |      |        |         |         |
|----|------|----|---|----|----|----|------|--------|---------|---------|
| 17 | C6   | C1 | B | 16 | 14 | 13 | 1.36 | 121.10 | 81.59   | 0.0053  |
| 18 | H6   | H4 | E | 17 | 16 | 14 | 1.08 | 120.00 | 0.00    | 0.1958  |
| 19 | C5   | C1 | B | 17 | 16 | 14 | 1.36 | 121.00 | 180.00  | -0.5215 |
| 20 | H5   | HA | E | 19 | 17 | 16 | 1.09 | 120.00 | 180.00  | 0.1928  |
| 21 | C4   | CA | B | 19 | 17 | 16 | 1.43 | 116.90 | 0.00    | 0.8185  |
| 22 | N4   | N2 | B | 21 | 19 | 17 | 1.32 | 120.10 | 180.00  | -0.9530 |
| 23 | H41  | H  | E | 22 | 21 | 19 | 1.01 | 117.70 | 180.00  | 0.4234  |
| 24 | H42  | H  | E | 22 | 21 | 19 | 1.01 | 120.27 | 0.00    | 0.4234  |
| 25 | N3   | NC | S | 21 | 19 | 17 | 1.33 | 121.70 | 0.00    | -0.7584 |
| 26 | C2   | C  | S | 25 | 21 | 19 | 1.36 | 120.50 | 0.00    | 0.7538  |
| 27 | O2   | O  | E | 26 | 25 | 21 | 1.24 | 122.40 | 180.00  | -0.6252 |
| 28 | C3'  | C3 | M | 11 | 8  | 7  | 1.53 | 115.78 | -329.11 | 0.2022  |
| 29 | H3'  | H1 | E | 28 | 11 | 8  | 1.09 | 109.50 | 30.00   | 0.0615  |
| 30 | C2'  | CT | B | 28 | 11 | 8  | 1.53 | 102.80 | -86.30  | 0.0670  |
| 31 | H2'1 | H1 | E | 30 | 28 | 11 | 1.09 | 109.50 | 120.00  | 0.0972  |
| 32 | O2'  | OH | S | 30 | 28 | 11 | 1.43 | 109.50 | 240.00  | -0.6139 |
| 33 | HO'2 | HO | E | 32 | 30 | 28 | 0.96 | 107.00 | 180.00  | 0.4186  |
| 34 | O3'  | OH | M | 28 | 11 | 8  | 1.42 | 116.52 | -203.47 | -0.6541 |
| 35 | H3T  | HO | M | 34 | 28 | 11 | 0.96 | 114.97 | 180.00  | 0.4376  |

CHARGE RC3E

|         |         |         |         |         |
|---------|---------|---------|---------|---------|
| 1.1662  | -0.7760 | -0.7760 | -0.4989 | 0.0558  |
| 0.0679  | 0.0679  | 0.1065  | 0.1174  | -0.3548 |
| 0.0066  | 0.2029  | -0.0484 | 0.0053  | 0.1958  |
| -0.5215 | 0.1928  | 0.8185  | -0.9530 | 0.4234  |
| 0.4234  | -0.7584 | 0.7538  | -0.6252 | 0.2022  |
| 0.0615  | 0.0670  | 0.0972  | -0.6139 | 0.4186  |
| -0.6541 | 0.4376  |         |         |         |

IMPROPER

|    |     |    |     |
|----|-----|----|-----|
| C6 | C2  | N1 | C1' |
| N1 | N3  | C2 | O2  |
| C4 | H41 | N4 | H42 |
| N1 | C5  | C6 | H6  |
| C6 | C4  | C5 | H5  |
| N3 | C5  | C4 | N4  |

LOOP CLOSING EXPLICIT

|     |     |
|-----|-----|
| C1' | C2' |
| C2  | N1  |

DONE

R-CYTOSINE - with 5' - OH group and 3' - OH group

| RCN     | INT   | 1  |     |    |    |    |      |        |         |         |
|---------|-------|----|-----|----|----|----|------|--------|---------|---------|
| CORRECT | NOMIT | DU | BEG |    |    |    |      |        |         |         |
| 0.0     |       |    |     |    |    |    |      |        |         |         |
| 1       | DUMM  | DU | M   | 0  | -1 | -2 | 0.00 | 0.00   | 0.00    | 0.0000  |
| 2       | DUMM  | DU | M   | 1  | 0  | -1 | 1.00 | 0.00   | 0.00    | 0.0000  |
| 3       | DUMM  | DU | M   | 2  | 1  | 0  | 1.00 | 90.00  | 0.00    | 0.0000  |
| 4       | H5T   | HO | M   | 3  | 2  | 1  | 1.00 | 120.00 | 180.00  | 0.4295  |
| 5       | O5'   | OH | M   | 4  | 3  | 2  | 0.96 | 101.43 | -98.89  | -0.6223 |
| 6       | C5'   | CI | M   | 5  | 4  | 3  | 1.44 | 119.00 | -39.22  | 0.0558  |
| 7       | H5'1  | H1 | E   | 6  | 5  | 4  | 1.09 | 109.50 | 60.00   | 0.0679  |
| 8       | H5'2  | H1 | E   | 6  | 5  | 4  | 1.09 | 109.50 | -60.00  | 0.0679  |
| 9       | C4'   | CT | M   | 6  | 5  | 4  | 1.52 | 110.00 | -180.00 | 0.1065  |
| 10      | H4'   | H1 | E   | 9  | 6  | 5  | 1.09 | 109.50 | -200.00 | 0.1174  |
| 11      | O4'   | OS | S   | 9  | 6  | 5  | 1.46 | 108.86 | -86.31  | -0.3548 |
| 12      | C1'   | CT | B   | 11 | 9  | 5  | 1.42 | 110.04 | 105.60  | 0.0066  |
| 13      | H1'   | H2 | E   | 12 | 11 | 9  | 1.09 | 109.50 | -240.00 | 0.2029  |

|    |      |    |   |    |    |    |      |        |         |         |
|----|------|----|---|----|----|----|------|--------|---------|---------|
| 14 | N1   | N* | S | 12 | 11 | 9  | 1.49 | 108.10 | -127.70 | -0.0484 |
| 15 | C6   | C1 | B | 14 | 12 | 11 | 1.36 | 121.10 | 81.59   | 0.0053  |
| 16 | H6   | H4 | E | 15 | 14 | 12 | 1.08 | 120.00 | 0.00    | 0.1958  |
| 17 | C5   | C1 | B | 15 | 14 | 12 | 1.36 | 121.00 | 180.00  | -0.5215 |
| 18 | H5   | HA | E | 17 | 15 | 14 | 1.09 | 120.00 | 180.00  | 0.1928  |
| 19 | C4   | CA | B | 17 | 15 | 14 | 1.43 | 116.90 | 0.00    | 0.8185  |
| 20 | N4   | N2 | B | 19 | 17 | 15 | 1.32 | 120.10 | 180.00  | -0.9530 |
| 21 | H41  | H  | E | 20 | 19 | 17 | 1.01 | 117.70 | 180.00  | 0.4234  |
| 22 | H42  | H  | E | 20 | 19 | 17 | 1.01 | 120.27 | 0.00    | 0.4234  |
| 23 | N3   | NC | S | 19 | 17 | 15 | 1.33 | 121.70 | 0.00    | -0.7584 |
| 24 | C2   | C  | S | 23 | 19 | 17 | 1.36 | 120.50 | 0.00    | 0.7538  |
| 25 | O2   | O  | E | 24 | 23 | 19 | 1.24 | 122.40 | 180.00  | -0.6252 |
| 26 | C3'  | C3 | M | 9  | 6  | 5  | 1.53 | 115.78 | -329.11 | 0.2022  |
| 27 | H3'  | H1 | E | 26 | 9  | 6  | 1.09 | 109.50 | 30.00   | 0.0615  |
| 28 | C2'  | CT | B | 26 | 9  | 6  | 1.53 | 102.80 | -86.30  | 0.0670  |
| 29 | H2'1 | H1 | E | 28 | 26 | 9  | 1.09 | 109.50 | 120.00  | 0.0972  |
| 30 | O2'  | OH | S | 28 | 26 | 9  | 1.43 | 109.50 | 240.00  | -0.6139 |
| 31 | HO'2 | HO | E | 30 | 28 | 26 | 0.96 | 107.00 | 180.00  | 0.4186  |
| 32 | O3'  | OH | M | 26 | 9  | 6  | 1.42 | 116.52 | -203.47 | -0.6541 |
| 33 | H3T  | HO | M | 32 | 26 | 9  | 0.96 | 114.97 | 180.00  | 0.4376  |

CHARGE resp RCYT

|         |         |         |         |         |
|---------|---------|---------|---------|---------|
| 0.4295  | -0.6223 | 0.0558  | 0.0679  | 0.0679  |
| 0.1065  | 0.1174  | -0.3548 | 0.0066  | 0.2029  |
| -0.0484 | 0.0053  | 0.1958  | -0.5215 | 0.1928  |
| 0.8185  | -0.9530 | 0.4234  | 0.4234  | -0.7584 |
| 0.7538  | -0.6252 | 0.2022  | 0.0615  | 0.0670  |
| 0.0972  | -0.6139 | 0.4186  | -0.6541 | 0.4376  |

IMPROPER

|    |     |    |     |
|----|-----|----|-----|
| C6 | C2  | N1 | C1' |
| N1 | N3  | C2 | O2  |
| C4 | H41 | N4 | H42 |
| N1 | C5  | C6 | H6  |
| C6 | C4  | C5 | H5  |
| N3 | C5  | C4 | N4  |

LOOP CLOSING EXPLICIT

|     |     |
|-----|-----|
| C1' | C2' |
| C2  | N1  |

DONE

STOP

**frcm0d.parmbsc0**

modifies parm99 for nucleic acids: see <http://mmb.pcb.ub.es/PARMBSC0/>  
MASS

CI 12.001

BOND

|       |       |       |
|-------|-------|-------|
| CI-H1 | 340.0 | 1.090 |
| CI-CT | 310.0 | 1.526 |
| OS-CI | 320.0 | 1.410 |
| OH-CI | 320.0 | 1.410 |

ANGLE

|          |       |        |
|----------|-------|--------|
| H1-CI-CT | 50.0  | 109.50 |
| H1-CI-H1 | 35.0  | 109.50 |
| CI-CT-H1 | 50.0  | 109.50 |
| CI-CT-OS | 50.0  | 109.50 |
| CI-CT-CT | 40.0  | 109.50 |
| OS-CI-H1 | 50.0  | 109.50 |
| OS-CI-CT | 50.0  | 109.50 |
| P -OS-CI | 100.0 | 120.50 |
| OH-CI-H1 | 50.0  | 109.50 |
| OH-CI-CT | 50.0  | 109.50 |
| HO-OH-CI | 55.0  | 108.50 |

DIHE

|             |   |          |           |      |       |
|-------------|---|----------|-----------|------|-------|
| X -CI-OS-X  | 3 | 1.150    | 0.0       | 3.0  |       |
| X -CI-OH-X  | 3 | 0.500    | 0.0       | 3.0  |       |
| X -CI-CT-X  | 9 | 1.400    | 0.0       | 3.0  |       |
| CT-OS-CT-CI | 1 | 0.383    | 0.0       | -3.0 |       |
| CT-OS-CT-CI | 1 | 0.100    | 180.0     | 2.0  |       |
| H1-CI-CT-OS | 1 | 0.250    | 0.0       | 1.0  |       |
| H1-CI-CT-OH | 1 | 0.250    | 0.0       | 1.0  |       |
| H1-CT-CI-OS | 1 | 0.250    | 0.0       | 1.0  |       |
| H1-CT-CI-OH | 1 | 0.250    | 0.0       | 1.0  |       |
| CI-CT-CT-CT | 1 | 0.180    | 0.0       | -3.0 |       |
| CI-CT-CT-CT | 1 | 0.250    | 180.0     | -2.0 |       |
| CI-CT-CT-CT | 1 | 0.200    | 180.0     | 1.0  |       |
| OS-P -OS-CI | 1 | 0.185181 | 31.79508  | -1.0 | alfa  |
| OS-P -OS-CI | 1 | 1.256531 | 351.95960 | -2.0 | alfa  |
| OS-P -OS-CI | 1 | 0.354858 | 357.24748 | 3.0  | alfa  |
| OH-P -OS-CI | 1 | 0.185181 | 31.79508  | -1.0 | alfa  |
| OH-P -OS-CI | 1 | 1.256531 | 351.95960 | -2.0 | alfa  |
| OH-P -OS-CI | 1 | 0.354858 | 357.24748 | 3.0  | alfa  |
| CT-CT-CI-OS | 1 | 1.178040 | 190.97653 | -1.0 | gamma |
| CT-CT-CI-OS | 1 | 0.092102 | 295.63279 | -2.0 | gamma |
| CT-CT-CI-OS | 1 | 0.962830 | 348.09535 | 3.0  | gamma |
| CT-CT-CI-OH | 1 | 1.178040 | 190.97653 | -1.0 | gamma |
| CT-CT-CI-OH | 1 | 0.092102 | 295.63279 | -2.0 | gamma |
| CT-CT-CI-OH | 1 | 0.962830 | 348.09535 | 3.0  | gamma |

NONB

CI 1.9080 0.1094

**frcmod.OL3.chi**

Original parameter file

MASS

|    |       |       |                                 |
|----|-------|-------|---------------------------------|
| C2 | 12.01 | 0.360 | sp2 C 5 memb.ring in purines    |
| C1 | 12.01 | 0.360 | sp2 C pyrimidines in pos. 5 & 6 |

BOND

|       |       |       |                                               |
|-------|-------|-------|-----------------------------------------------|
| C2-H5 | 367.0 | 1.080 | changed from 340. bsd on C6H6 nmodes; ADE,GUA |
| C2-N* | 440.0 | 1.371 | JCC,7,(1986),230; ADE,GUA                     |
| C2-NB | 529.0 | 1.304 | JCC,7,(1986),230; ADE,GUA                     |
| C -C1 | 410.0 | 1.444 | JCC,7,(1986),230; THY,URA                     |
| CA-C1 | 427.0 | 1.433 | JCC,7,(1986),230; CYT                         |
| C1-C1 | 549.0 | 1.350 | JCC,7,(1986),230; CYT,THY,URA                 |
| C1-CT | 317.0 | 1.510 | JCC,7,(1986),230; THY                         |
| C1-HA | 367.0 | 1.080 | changed from 340. bsd on C6H6 nmodes; CYT,URA |
| C1-H4 | 367.0 | 1.080 | changed from 340. bsd on C6H6 nmodes; CYT,URA |
| C1-N* | 448.0 | 1.365 | JCC,7,(1986),230; CYT,THY,URA                 |

ANGLE

|          |      |        |                                              |
|----------|------|--------|----------------------------------------------|
| H5-C2-N* | 50.0 | 123.05 |                                              |
| H5-C2-NB | 50.0 | 123.05 |                                              |
| N*-C2-NB | 70.0 | 113.90 |                                              |
| CB-N*-C2 | 70.0 | 105.40 |                                              |
| C2-N*-CT | 70.0 | 128.80 |                                              |
| CB-NB-C2 | 70.0 | 103.80 |                                              |
| C1-C -NA | 70.0 | 114.10 |                                              |
| C1-C -O  | 80.0 | 125.30 |                                              |
| C1-CA-N2 | 70.0 | 120.10 |                                              |
| C1-CA-NC | 70.0 | 121.50 |                                              |
| C -C1-C1 | 63.0 | 120.70 | changed from 85.0 bsd on C6H6 nmodes; NA thy |
| C -C1-CT | 70.0 | 119.70 |                                              |
| C -C1-HA | 50.0 | 119.70 |                                              |
| C -C1-H4 | 50.0 | 119.70 |                                              |
| CA-C1-C1 | 63.0 | 117.00 | changed from 85.0 bsd on C6H6 nmodes; NA cyt |
| CA-C1-HA | 50.0 | 123.30 |                                              |
| CA-C1-H4 | 50.0 | 123.30 |                                              |
| C1-C1-CT | 70.0 | 119.70 |                                              |
| C1-C1-HA | 50.0 | 119.70 |                                              |
| C1-C1-H4 | 50.0 | 119.70 |                                              |
| C1-C1-N* | 70.0 | 121.20 |                                              |
| H4-C1-N* | 50.0 | 119.10 |                                              |
| H1-CT-C1 | 50.0 | 109.50 | Junmei et al, 1999                           |
| HC-CT-C1 | 50.0 | 109.50 | changed based on NMA nmodes                  |
| C -N*-C1 | 70.0 | 121.60 |                                              |
| C1-N*-CT | 70.0 | 121.20 |                                              |

DIHEDRAL

|             |   |         |         |     |                     |
|-------------|---|---------|---------|-----|---------------------|
| X -C2-N*-X  | 4 | 6.80    | 180.0   | 2.  | JCC,7,(1986),230    |
| X -C2-NB-X  | 2 | 20.00   | 180.0   | 2.  | JCC,7,(1986),230    |
| X -C -C1-X  | 4 | 8.70    | 180.0   | 2.  | intrpol.bsd.on C6H6 |
| X -CA-C1-X  | 4 | 10.20   | 180.0   | 2.  | intrpol.bsd.on C6H6 |
| X -C1-C1-X  | 4 | 26.60   | 180.0   | 2.  | intrpol.bsd.on C6H6 |
| X -C1-CT-X  | 6 | 0.00    | 0.0     | 3.  | JCC,7,(1986),230    |
| X -C1-N*-X  | 4 | 7.40    | 180.0   | 2.  | JCC,7,(1986),230    |
| HC-CT-C1-C1 | 1 | 0.38    | 180.0   | -3. | Junmei et al, 1999  |
| HC-CT-C1-C1 | 1 | 1.15    | 0.0     | 1.  | Junmei et al, 1999  |
| C1-C1-C -O  | 1 | 2.175   | 180.0   | -2. | Junmei et al, 1999  |
| C1-C1-C -O  | 1 | 0.30    | 0.0     | 3.  | Junmei et al, 1999  |
| OS-CT-N*-C2 | 1 | 0.96561 | 68.7902 | -1. | ol3 chi ade         |
| OS-CT-N*-C2 | 1 | 1.07403 | 15.6360 | -2. | ol3 chi ade         |

|             |   |         |          |     |     |     |         |
|-------------|---|---------|----------|-----|-----|-----|---------|
| OS-CT-N*-C2 | 1 | 0.45754 | 171.5787 | -3. | ol3 | chi | ade     |
| OS-CT-N*-C2 | 1 | 0.30917 | 19.0921  | 4.  | ol3 | chi | ade     |
| OS-CT-N*-CK | 1 | 0.70510 | 74.7558  | -1. | ol3 | chi | gua     |
| OS-CT-N*-CK | 1 | 1.06546 | 6.2286   | -2. | ol3 | chi | gua     |
| OS-CT-N*-CK | 1 | 0.44273 | 168.6503 | -3. | ol3 | chi | gua     |
| OS-CT-N*-CK | 1 | 0.25602 | 3.9746   | 4.  | ol3 | chi | gua     |
| OS-CT-N*-C1 | 1 | 1.22506 | 146.9892 | -1. | ol3 | chi | cyt     |
| OS-CT-N*-C1 | 1 | 1.63459 | 16.4766  | -2. | ol3 | chi | cyt     |
| OS-CT-N*-C1 | 1 | 0.93747 | 185.8774 | -3. | ol3 | chi | cyt     |
| OS-CT-N*-C1 | 1 | 0.31033 | 32.1590  | 4.  | ol3 | chi | cyt     |
| OS-CT-N*-CM | 1 | 1.02514 | 149.8583 | -1. | ol3 | chi | ura,thy |
| OS-CT-N*-CM | 1 | 1.74876 | 16.7648  | -2. | ol3 | chi | ura,thy |
| OS-CT-N*-CM | 1 | 0.58150 | 179.3474 | -3. | ol3 | chi | ura,thy |
| OS-CT-N*-CM | 1 | 0.35148 | 16.0016  | 4.  | ol3 | chi | ura,thy |

IMPROPER

|             |     |      |    |                 |
|-------------|-----|------|----|-----------------|
| X -X -C2-H5 | 1.1 | 180. | 2. |                 |
| CB-C2-N*-CT | 1.0 | 180. | 2. |                 |
| X -X -C1-H4 | 1.1 | 180. | 2. |                 |
| X -X -C1-HA | 1.1 | 180. | 2. |                 |
| C -C1-N*-CT | 1.0 | 180. | 2. | dac guess, 9/94 |
| C -C1-C1-CT | 1.1 | 180. | 2. | dac guess, 9/94 |
| C1-N2-CA-NC | 1.1 | 180. | 2. | dac guess, 9/94 |

NONBOND

|    |        |        |            |
|----|--------|--------|------------|
| C2 | 1.9080 | 0.0860 | Spellmeyer |
| C1 | 1.9080 | 0.0860 | Spellmeyer |

**frcmod.99bsc0-chiol3-CaseP**

# force field modification for O2 (->OP) and OS (->OR) according to Steinbrecher, Latzer, and Case, JCTC 2012 including corrected 1-4 VdW parameters for delta, tau2, zeta, alpha, and gamma dihedrals.

MASS

|          |       |                                          |
|----------|-------|------------------------------------------|
| OP 16.00 | 0.434 | carboxyl and phosphate group oxygen (O2) |
| OR 16.00 | 0.465 | ether and ester oxygen (OS)              |

BOND

|       |       |       |                                   |
|-------|-------|-------|-----------------------------------|
| C -OP | 656.0 | 1.250 | JCC,7,(1986),230; GLU,ASP         |
| OP-P  | 525.0 | 1.480 | JCC,7,(1986),230; NA PHOSPHATES   |
| C -OR | 450.0 | 1.323 | Junmei et al, 1999                |
| CM-OR | 480.0 | 1.240 | Junmei et al, 1999                |
| CT-OR | 320.0 | 1.410 | JCC,7,(1986),230; NUCLEIC ACIDS   |
| OR-P  | 230.0 | 1.610 | JCC,7,(1986),230; NA PHOSPHATES   |
| HO-OR | 553.0 | 0.960 | JCC,7,(1986),230; NUCLEOTIDE ENDS |
| OR-CI | 320.0 | 1.410 |                                   |
| C3-OR | 320.0 | 1.410 | JCC,7,(1986),230; NUCLEIC ACIDS   |

ANGLE

|          |       |        |                             |                   |
|----------|-------|--------|-----------------------------|-------------------|
| CT-C -OP | 70.0  | 117.00 |                             |                   |
| OP-C -OP | 80.0  | 126.00 | AA GLU                      | (SCH JPC 79,2379) |
| OP-C -O2 | 80.0  | 126.00 | AA GLU                      | (SCH JPC 79,2379) |
| O2-C -OP | 80.0  | 126.00 | AA GLU                      | (SCH JPC 79,2379) |
| OP-P -OH | 45.0  | 108.23 |                             |                   |
| OP-P -OP | 140.0 | 119.90 |                             |                   |
| OP-P -O2 | 140.0 | 119.90 |                             |                   |
| O2-P -OP | 140.0 | 119.90 |                             |                   |
| OP-P -OR | 100.0 | 108.23 |                             |                   |
| CT-C -OR | 80.0  | 115.00 | Junmei et al, 1999          |                   |
| O -C -OR | 80.0  | 125.00 | Junmei et al, 1999          |                   |
| H5-C -OR | 50.0  | 107.00 | Junmei et al, 1999          |                   |
| CM-CM-OR | 80.0  | 125.00 | Junmei et al, 1999          |                   |
| H4-CM-OR | 50.0  | 113.00 | Junmei et al, 1999          |                   |
| H1-CT-OR | 50.0  | 109.50 | changed based on NMA nmodes |                   |
| H2-CT-OR | 50.0  | 109.50 | changed based on NMA nmodes |                   |
| C -CT-OR | 60.0  | 109.50 | Junmei et al, 1999          |                   |
| CM-CT-OR | 50.0  | 109.50 | Junmei et al, 1999          |                   |
| CT-CT-OR | 50.0  | 109.50 |                             |                   |
| OR-CT-OR | 160.0 | 101.00 | Junmei et al, 1999          |                   |
| OS-CT-OR | 160.0 | 101.00 | Junmei et al, 1999          |                   |
| OR-CT-OS | 160.0 | 101.00 | Junmei et al, 1999          |                   |
| OR-CT-CY | 50.0  | 110.00 | Junmei et al, 1999          |                   |
| OR-CT-CZ | 50.0  | 110.00 | Junmei et al, 1999          |                   |
| OR-CT-N* | 50.0  | 109.50 |                             |                   |
| C -OR-CT | 60.0  | 117.00 | Junmei et al, 1999          |                   |
| CM-OR-CT | 60.0  | 117.00 | Junmei et al, 1999          |                   |
| CT-OR-CT | 60.0  | 109.50 |                             |                   |
| CT-OR-P  | 100.0 | 120.50 |                             |                   |
| P -OR-P  | 100.0 | 120.50 |                             |                   |
| OH-P -OR | 45.0  | 102.60 |                             |                   |
| OR-P -OR | 45.0  | 102.60 |                             |                   |
| OS-P -OR | 45.0  | 102.60 |                             |                   |
| OR-P -OS | 45.0  | 102.60 |                             |                   |
| CI-CT-OR | 50.0  | 109.50 |                             |                   |
| OR-CI-H1 | 50.0  | 109.50 |                             |                   |
| OR-CI-CT | 50.0  | 109.50 |                             |                   |
| P -OR-CI | 100.0 | 120.50 |                             |                   |
| H1-C3-OR | 50.0  | 109.50 | changed based on NMA nmodes |                   |
| CT-C3-OR | 50.0  | 109.50 |                             |                   |

|          |       |        |
|----------|-------|--------|
| C3-CT-OR | 50.0  | 109.50 |
| C3-OR-P  | 100.0 | 120.50 |

DIHE

|             |   |          |          |     |                     |
|-------------|---|----------|----------|-----|---------------------|
| X -OP-C -OP |   | 10.5     | 180.0    | 2.  | JCC,7,(1986),230    |
| X -O2-C -OP |   | 10.5     | 180.0    | 2.  | JCC,7,(1986),230    |
| X -OP-C -O2 |   | 10.5     | 180.0    | 2.  | JCC,7,(1986),230    |
| X -C -OR-X  | 2 | 5.40     | 180.0    | 2.  | Junmei et al, 1999  |
| X -CM-OR-X  | 2 | 2.10     | 180.0    | 2.  | Junmei et al, 1999  |
| X -CT-OR-X  | 3 | 1.15     | 0.0      | 3.  | JCC,7,(1986),230    |
| X -OR-P -X  | 3 | 0.75     | 0.0      | 3.  | JCC,7,(1986),230    |
| OH-P -OR-CT | 1 | 0.25     | 0.0      | -3. | JCC,7,(1986),230    |
| OH-P -OR-CT | 1 | 1.20     | 0.0      | 2.  | gg&gt ene.631g*/mp2 |
| OR-P -OR-C3 | 1 | 0.374954 | 0.660088 | -3. | zeta corrected for  |
| 1-4 VdW     |   |          |          |     |                     |
| OR-P -OR-C3 | 1 | 1.196555 | 0.421469 | -2. | zeta corrected for  |
| 1-4 VdW     |   |          |          |     |                     |
| OR-P -OR-C3 | 1 | 0.062735 | 193.362  | 1.  | zeta corrected for  |
| 1-4 VdW     |   |          |          |     |                     |
| OH-P -OR-C3 | 1 | 0.374954 | 0.660088 | -3. | zeta corrected for  |
| 1-4 VdW     |   |          |          |     |                     |
| OH-P -OR-C3 | 1 | 1.196555 | 0.421469 | -2. | zeta corrected for  |
| 1-4 VdW     |   |          |          |     |                     |
| OH-P -OR-C3 | 1 | 0.062735 | 193.362  | 1.  | zeta corrected for  |
| 1-4 VdW     |   |          |          |     |                     |
| OS-P -OR-CT | 1 | 0.25     | 0.0      | -3. | JCC,7,(1986),230    |
| OS-P -OR-CT | 1 | 1.20     | 0.0      | 2.  | gg&gt ene.631g*/mp2 |
| OR-P -OS-CT | 1 | 0.25     | 0.0      | -3. | JCC,7,(1986),230    |
| OR-P -OS-CT | 1 | 1.20     | 0.0      | 2.  | gg&gt ene.631g*/mp2 |
| CT-CT-OR-CT | 1 | 0.383    | 0.0      | -3. |                     |
| CT-CT-OR-CT | 1 | 0.1      | 180.0    | 2.  |                     |
| CT-CT-OR-C  | 1 | 0.383    | 0.0      | -3. | Junmei et al, 1999  |
| CT-CT-OR-C  | 1 | 0.80     | 180.0    | 1.  | Junmei et al, 1999  |
| CT-OR-CT-OR | 1 | 0.10     | 0.0      | -3. | Junmei et al, 1999  |
| CT-OR-CT-OR | 1 | 0.85     | 180.0    | -2. | Junmei et al, 1999  |
| CT-OR-CT-OR | 1 | 1.35     | 180.0    | 1.  | Junmei et al, 1999  |
| CT-OS-CT-OR | 1 | 0.10     | 0.0      | -3. | Junmei et al, 1999  |
| CT-OS-CT-OR | 1 | 0.85     | 180.0    | -2. | Junmei et al, 1999  |
| CT-OS-CT-OR | 1 | 1.35     | 180.0    | 1.  | Junmei et al, 1999  |
| CT-OR-CT-OS | 1 | 0.10     | 0.0      | -3. | Junmei et al, 1999  |
| CT-OR-CT-OS | 1 | 0.85     | 180.0    | -2. | Junmei et al, 1999  |
| CT-OR-CT-OS | 1 | 1.35     | 180.0    | 1.  | Junmei et al, 1999  |
| CT-OR-CT-N* | 1 | 0.383    | 0.0      | -3. | parm98.dat,         |
| TC,PC,PAK   |   |          |          |     |                     |
| CT-OR-CT-N* | 1 | 0.65     | 0.0      | 2.  | Piotr et al.        |
| O -C -OR-CT | 1 | 2.70     | 180.0    | -2. | Junmei et al, 1999  |
| O -C -OR-CT | 1 | 1.40     | 180.0    | 1.  | Junmei et al, 1999  |
| OR-CT-N*-CK | 1 | 0.00     | 000.0    | -2. | parm98, TC,PC,PAK   |
| OR-CT-N*-CK | 1 | 2.50     | 0.0      | 1.  | parm98, TC,PC,PAK   |
| OR-CT-N*-CM | 1 | 0.00     | 000.0    | -2. | parm98, TC,PC,PAK   |
| OR-CT-N*-CM | 1 | 2.50     | 0.0      | 1.  | parm98, TC,PC,PAK   |
| OR-CT-CT-OR | 1 | 0.144    | 0.0      | -3. | parm98, TC,PC,PAK   |
| OR-CT-CT-OR | 1 | 1.175    | 0.0      | 2.  | Piotr et al.        |
| OS-CT-CT-OR | 1 | 0.144    | 0.0      | -3. | parm98, TC,PC,PAK   |
| OS-CT-CT-OR | 1 | 1.175    | 0.0      | 2.  | Piotr et al.        |
| OR-C3-CT-OS | 1 | 0.098221 | 52.691   | -3. | delta corrected for |
| 1-4 VdW     |   |          |          |     |                     |
| OR-C3-CT-OS | 1 | 1.199546 | 10.01992 | 2.  | delta corrected for |
| 1-4 VdW     |   |          |          |     |                     |

|                       |   |          |           |      |                         |
|-----------------------|---|----------|-----------|------|-------------------------|
| OR-C3-CT-OH           | 1 | 0.033754 | 0.0       | -3.  | tau2(mirror)            |
| corrected for 1-4 VdW |   |          |           |      |                         |
| OR-C3-CT-OH           | 1 | 1.094752 | 0.0       | 2.   | tau2(mirror)            |
| corrected for 1-4 VdW |   |          |           |      |                         |
| H1-C3-CT-OR           | 1 | 0.025904 | 146.58    | -3.  | delta corrected for     |
| 1-4 VdW               |   |          |           |      |                         |
| H1-C3-CT-OR           | 1 | 0.200389 | 353.98061 | 1.   | delta corrected for     |
| 1-4 VdW               |   |          |           |      |                         |
| H1-CT-C3-OR           | 1 | 0.025904 | 146.58    | -3.  | tau corrected for 1-    |
| 4 VdW                 |   |          |           |      |                         |
| H1-CT-C3-OR           | 1 | 0.200389 | 353.98061 | 1.   | tau corrected for 1-    |
| 4 VdW                 |   |          |           |      |                         |
| HC-CT-CT-OR           | 1 | 0.000    | 0.0       | -3.  | JCC,7,(1986),230        |
| HC-CT-CT-OR           | 1 | 0.25     | 0.0       | 1.   | Junmei et al, 1999      |
| X -CI-OR-X            | 3 | 1.150    | 0.0       | 3.0  |                         |
| CT-OR-CT-CI           | 1 | 0.383    | 0.0       | -3.0 |                         |
| CT-OR-CT-CI           | 1 | 0.100    | 180.0     | 2.0  |                         |
| H1-CI-CT-OR           | 1 | 0.250    | 0.0       | 1.0  |                         |
| H1-CT-CI-OR           | 1 | 0.85333  | 359.85087 | 1.0  | gamma corrected for 1-4 |
| VdW                   |   |          |           |      |                         |
| OR-P -OR-CI           | 1 | 0.125609 | 41.051    | -1.0 | alpha corrected for 1-4 |
| VdW                   |   |          |           |      |                         |
| OR-P -OR-CI           | 1 | 1.251237 | 352.34289 | -2.0 | alpha corrected for 1-4 |
| VdW                   |   |          |           |      |                         |
| OR-P -OR-CI           | 1 | 0.478513 | 358.47366 | 3.0  | alpha corrected for 1-4 |
| VdW                   |   |          |           |      |                         |
| C3-CT-CI-OR           | 1 | 0.988048 | 171.1526  | -1.0 | gamma corrected for 1-4 |
| VdW                   |   |          |           |      |                         |
| C3-CT-CI-OR           | 1 | 0.027335 | 183.6548  | -2.0 | gamma corrected for 1-4 |
| VdW                   |   |          |           |      |                         |
| C3-CT-CI-OR           | 1 | 0.827287 | 346.2412  | 3.0  | gamma corrected for 1-4 |
| VdW                   |   |          |           |      |                         |
| OR-CT-N*-C2           | 1 | 0.96561  | 68.7902   | -1.  | ol3 chi ade             |
| OR-CT-N*-C2           | 1 | 1.07403  | 15.6360   | -2.  | ol3 chi ade             |
| OR-CT-N*-C2           | 1 | 0.45754  | 171.5787  | -3.  | ol3 chi ade             |
| OR-CT-N*-C2           | 1 | 0.30917  | 19.0921   | 4.   | ol3 chi ade             |
| OR-CT-N*-CK           | 1 | 0.70510  | 74.7558   | -1.  | ol3 chi gua             |
| OR-CT-N*-CK           | 1 | 1.06546  | 6.2286    | -2.  | ol3 chi gua             |
| OR-CT-N*-CK           | 1 | 0.44273  | 168.6503  | -3.  | ol3 chi gua             |
| OR-CT-N*-CK           | 1 | 0.25602  | 3.9746    | 4.   | ol3 chi gua             |
| OR-CT-N*-C1           | 1 | 1.22506  | 146.9892  | -1.  | ol3 chi cyt             |
| OR-CT-N*-C1           | 1 | 1.63459  | 16.4766   | -2.  | ol3 chi cyt             |
| OR-CT-N*-C1           | 1 | 0.93747  | 185.8774  | -3.  | ol3 chi cyt             |
| OR-CT-N*-C1           | 1 | 0.31033  | 32.1590   | 4.   | ol3 chi cyt             |
| OR-CT-N*-CM           | 1 | 1.02514  | 149.8583  | -1.  | ol3 chi ura,thy         |
| OR-CT-N*-CM           | 1 | 1.74876  | 16.7648   | -2.  | ol3 chi ura,thy         |
| OR-CT-N*-CM           | 1 | 0.58150  | 179.3474  | -3.  | ol3 chi ura,thy         |
| OR-CT-N*-CM           | 1 | 0.35148  | 16.0016   | 4.   | ol3 chi ura,thy         |
| X -C3-OR-X            | 3 | 1.15     | 0.0       | 3.   | JCC,7,(1986),230        |
| C3-CT-OR-CT           | 1 | 0.383    | 0.0       | -3.  |                         |
| C3-CT-OR-CT           | 1 | 0.1      | 180.0     | 2.   |                         |
| OR-C3-CT-OR           | 1 | 0.144    | 0.0       | -3.  | parm98, TC,PC,PAK       |
| OR-C3-CT-OR           | 1 | 1.175    | 0.0       | 2.   | Piotr et al.            |
| OS-C3-CT-OR           | 1 | 0.144    | 0.0       | -3.  | parm98, TC,PC,PAK       |
| OS-C3-CT-OR           | 1 | 1.175    | 0.0       | 2.   | Piotr et al.            |
| OR-C3-CT-OS           | 1 | 0.144    | 0.0       | -3.  | parm98, TC,PC,PAK       |
| OR-C3-CT-OS           | 1 | 1.175    | 0.0       | 2.   | Piotr et al.            |
| OR-C3-CT-OH           | 1 | 0.144    | 0.0       | -3.  | parm98, TC,PC,PAK       |
| OR-C3-CT-OH           | 1 | 1.175    | 0.0       | 2.   | Piotr et al.            |
| OR-CT-C3-OH           | 1 | 0.144    | 0.0       | -3.  | parm98, TC,PC,PAK       |



|                       |   |          |          |     |                     |
|-----------------------|---|----------|----------|-----|---------------------|
| OR-CT-C3-OH           | 1 | 1.175    | 0.0      | 2.  | Piotr et al.        |
| H1-C3-CT-OR           | 1 | 0.000    | 0.0      | -3. | JCC,7,(1986),230    |
| H1-C3-CT-OR           | 1 | 0.25     | 0.0      | 1.  | Junmei et al, 1999  |
| H1-CT-C3-OR           | 1 | 0.000    | 0.0      | -3. | JCC,7,(1986),230    |
| H1-CT-C3-OR           | 1 | 0.25     | 0.0      | 1.  | Junmei et al, 1999  |
| HC-CT-C3-OR           | 1 | 0.000    | 0.0      | -3. | JCC,7,(1986),230    |
| HC-CT-C3-OR           | 1 | 0.25     | 0.0      | 1.  | Junmei et al, 1999  |
| OR-C3-CT-CI           | 1 | 0.182735 | 6.319592 | 3.0 | delta corrected for |
| 1-4 VdW               |   |          |          |     |                     |
| OR-C3-CT-CT           | 1 | 0.24569  | 12.31214 | 3.0 | tau2(mirror)        |
| corrected for 1-4 VdW |   |          |          |     |                     |
| C3-OR-P -OP           | 1 | 0.12716  | 0.052366 | 3.0 | zeta corrected for  |
| 1-4 VdW               |   |          |          |     |                     |
| CI-OR-P -OP           | 1 | 0.12716  | 0.052366 | 3.0 | alpha corrected for |
| 1-4 VdW               |   |          |          |     |                     |
| OR-CI-CT-OS           | 1 | 0.15377  | 0.485128 | 3.0 | gamma corrected for |
| 1-4 VdW               |   |          |          |     |                     |

NONBON

|    |        |        |                        |
|----|--------|--------|------------------------|
| OP | 1.7493 | 0.2100 | Case et al., JCTC 2012 |
| OR | 1.7718 | 0.1700 | Case et al., JCTC 2012 |
